# Supplementary material for: Solid state coordination chemistry of the copper(I)–cyano–organodiimine system. Two- and three-dimensional copper cyanide phases incorporating linear dipodal ligands
Source: Royal Society of Chemistry journal article supplement (doi:10.1039/b100390i), 2001-01-01
Supplement: b100390i-1.doc [file b100390i-1.doc]

Table 1. Crystal data and structure refinement for [Cu3(CN)3(pyr)].

Identification code [Cu3(CN)3(pyr)]

Empirical formula C7H4Cu3N5

# Formula weight 348.77

Temperature 115(2) K

Wavelength 0.71073 Å

Crystal system Monoclinic

Space group C2/c

Unit cell dimensions *a* = 15.8220(8) Å  = 90.

*b* = 9.6848(5) Å = 107.1420(10).

*c* = 20.4542(10) Å  = 90.

Volume 2995.0(3) Å3

Z 12

Density (calculated) 2.320 Mg/m3

Absorption coefficient 6.299 mm-1

F(000) 2016

Crystal size 0.17 x 0.13 x 0.08 mm3

Theta range for data collection 2.08 to 28.27.

Index ranges -21<=h<=19, -12<=k<=9, -24<=l<=26

Reflections collected 9981

Independent reflections 3627 [R(int) = 0.0413]

Completeness to theta = 28.27 97.7 %

Refinement method Full-matrix least-squares on F2

Data / restraints / parameters 3627 / 0 / 205

Goodness-of-fit on F2 1.091

Final R indices [I>2sigma(I)] R1 = 0.0562, wR2 = 0.1262

R indices (all data) R1 = 0.0864, wR2 = 0.1348

Extinction coefficient 0.00035(4)

Largest diff. peak and hole 1.787 and -1.584 e.Å-3

Table 2. Atomic coordinates ( x 104) and equivalent isotropic displacement parameters (Å2x 103) for [Cu3(CN)3(pyr)]. U(eq) is defined as one third of the trace of the orthogonalized Uij tensor.

______________________________________________________________________________

x y z U(eq)

______________________________________________________________________________

Cu(1) 1670(1) 7759(1) 834(1) 17(1)

Cu(2) 0 8034(1) 2500 21(1)

Cu(3) -249(1) 7498(1) 49(1) 20(1)

Cu(4) 3086(1) 3024(1) 1715(1) 17(1)

Cu(5) 3578(1) 8024(1) 1602(1) 16(1)

N(10) -1603(4) 7484(6) 27(3) 18(1)

N(11) 4937(5) 8021(6) 1626(3) 20(1)

N(12) 6721(4) 8010(6) 1696(3) 17(1)

N(1) 2287(5) 7564(7) 181(3) 19(1)

N(2) 1058(5) 7887(7) 1491(3) 17(1)

N(3) 638(5) 7947(6) 1869(4) 17(2)

N(4) -33(5) 9415(7) 14(3) 24(2)

N(5) -28(5) 5606(7) 16(4) 21(2)

N(6) 3327(5) 4922(7) 1728(4) 21(2)

N(7) 3383(5) 6120(7) 1695(4) 19(2)

N(8) 3338(4) 9927(6) 1596(3) 17(2)

N(9) 3291(5) 11142(6) 1631(3) 16(1)

C(1) 2287(5) 7564(7) 181(3) 19(1)

C(2) 1058(5) 7887(7) 1491(3) 17(1)

C(3) 638(5) 7947(6) 1869(4) 17(2)

C(4) -33(5) 9415(7) 14(3) 24(2)

C(5) -28(5) 5606(7) 16(4) 21(2)

C(6) 3327(5) 4922(7) 1728(4) 21(2)

C(7) 3383(5) 6120(7) 1695(4) 19(2)

C(8) 3338(4) 9927(6) 1596(3) 17(2)

C(9) 3291(5) 11142(6) 1631(3) 16(1)

C(10) -2024(5) 8659(8) 111(4) 21(2)

C(11) -2092(5) 6346(8) -83(4) 23(2)

C(12) 5360(6) 6844(7) 1586(4) 22(2)

C(13) 5405(5) 9178(7) 1707(4) 21(2)

C(14) 6297(5) 9194(7) 1748(4) 19(2)

C(15) 6260(6) 6834(7) 1624(4) 19(2)

______________________________________________________________________________

Table 3. Bond lengths [Å] and angles [] for [Cu3(CN)3(pyr)].

_____________________________________________________

Cu(1)-N(2) 1.880(7)

Cu(1)-N(1) 1.880(6)

Cu(1)-Cu(5) 2.9749(15)

Cu(1)-Cu(3) 2.9988(15)

Cu(2)-N(3) 1.861(7)

Cu(2)-C(3)#1 1.861(7)

Cu(2)-N(3)#1 1.861(7)

Cu(2)-Cu(4)#2 2.9810(10)

Cu(2)-Cu(4)#3 2.9810(10)

Cu(3)-N(5) 1.871(6)

Cu(3)-N(4) 1.893(7)

Cu(3)-N(10) 2.129(6)

Cu(4)-C(9)#4 1.868(6)

Cu(4)-N(9)#4 1.868(6)

Cu(4)-N(6) 1.876(7)

Cu(4)-N(12)#5 2.148(7)

Cu(4)-Cu(2)#6 2.9810(10)

Cu(5)-N(8) 1.881(6)

Cu(5)-N(7) 1.889(7)

Cu(5)-N(11) 2.136(7)

N(10)-C(11) 1.327(10)

N(10)-C(10) 1.356(10)

N(11)-C(13) 1.327(9)

N(11)-C(12) 1.337(9)

N(12)-C(15) 1.337(9)

N(12)-C(14) 1.349(9)

N(12)-Cu(4)#7 2.148(7)

N(1)-C(1)#8 1.146(13)

N(1)-N(1)#8 1.146(13)

N(2)-N(3) 1.159(8)

N(4)-C(4)#9 1.142(14)

N(4)-N(4)#9 1.142(14)

N(5)-C(5)#10 1.179(13)

N(5)-N(5)#10 1.179(13)

N(6)-N(7) 1.167(9)

N(8)-N(9) 1.182(8)

N(9)-Cu(4)#11 1.868(6)

C(10)-C(11)#12 1.383(11)

C(11)-C(10)#12 1.383(11)

C(12)-C(15) 1.402(10)

C(13)-C(14) 1.388(10)

N(2)-Cu(1)-N(1) 178.0(3)

N(2)-Cu(1)-Cu(5) 105.8(2)

N(1)-Cu(1)-Cu(5) 74.1(2)

N(2)-Cu(1)-Cu(3) 74.6(2)

N(1)-Cu(1)-Cu(3) 105.5(2)

Cu(5)-Cu(1)-Cu(3) 179.55(4)

N(3)-Cu(2)-C(3)#1 174.8(4)

N(3)-Cu(2)-N(3)#1 174.8(4)

C(3)#1-Cu(2)-N(3)#1 0.0(5)

N(3)-Cu(2)-Cu(4)#2 72.6(2)

C(3)#1-Cu(2)-Cu(4)#2 107.4(2)

N(3)#1-Cu(2)-Cu(4)#2 107.4(2)

N(3)-Cu(2)-Cu(4)#3 107.4(2)

C(3)#1-Cu(2)-Cu(4)#3 72.6(2)

N(3)#1-Cu(2)-Cu(4)#3 72.6(2)

Cu(4)#2-Cu(2)-Cu(4)#3 179.62(6)

N(5)-Cu(3)-N(4) 157.1(3)

N(5)-Cu(3)-N(10) 101.0(3)

N(4)-Cu(3)-N(10) 101.4(3)

N(5)-Cu(3)-Cu(1) 86.0(2)

N(4)-Cu(3)-Cu(1) 76.8(2)

N(10)-Cu(3)-Cu(1) 149.95(17)

C(9)#4-Cu(4)-N(9)#4 0.0(4)

C(9)#4-Cu(4)-N(6) 156.5(3)

N(9)#4-Cu(4)-N(6) 156.5(3)

C(9)#4-Cu(4)-N(12)#5 101.2(3)

N(9)#4-Cu(4)-N(12)#5 101.2(3)

N(6)-Cu(4)-N(12)#5 101.9(3)

C(9)#4-Cu(4)-Cu(2)#6 82.9(2)

N(9)#4-Cu(4)-Cu(2)#6 82.9(2)

N(6)-Cu(4)-Cu(2)#6 79.6(2)

N(12)#5-Cu(4)-Cu(2)#6 150.00(17)

N(8)-Cu(5)-N(7) 156.7(3)

N(8)-Cu(5)-N(11) 101.6(3)

N(7)-Cu(5)-N(11) 100.9(3)

N(8)-Cu(5)-Cu(1) 84.8(2)

N(7)-Cu(5)-Cu(1) 78.3(2)

N(11)-Cu(5)-Cu(1) 150.43(18)

C(11)-N(10)-C(10) 115.8(7)

C(11)-N(10)-Cu(3) 122.7(5)

C(10)-N(10)-Cu(3) 121.4(5)

C(13)-N(11)-C(12) 117.1(7)

C(13)-N(11)-Cu(5) 121.5(5)

C(12)-N(11)-Cu(5) 121.3(5)

C(15)-N(12)-C(14) 117.6(7)

C(15)-N(12)-Cu(4)#7 121.4(5)

C(14)-N(12)-Cu(4)#7 121.0(5)

C(1)#8-N(1)-N(1)#8 0.0(8)

C(1)#8-N(1)-Cu(1) 175.5(9)

N(1)#8-N(1)-Cu(1) 175.5(9)

N(3)-N(2)-Cu(1) 176.2(6)

N(2)-N(3)-Cu(2) 177.9(6)

C(4)#9-N(4)-N(4)#9 0.00(8)

C(4)#9-N(4)-Cu(3) 175.0(9)

N(4)#9-N(4)-Cu(3) 175.0(9)

C(5)#10-N(5)-N(5)#10 0.0(7)

C(5)#10-N(5)-Cu(3) 173.7(9)

N(5)#10-N(5)-Cu(3) 173.7(9)

N(7)-N(6)-Cu(4) 172.7(6)

N(6)-N(7)-Cu(5) 173.7(6)

N(9)-N(8)-Cu(5) 172.2(6)

N(8)-N(9)-Cu(4)#11 172.8(6)

N(10)-C(10)-C(11)#12 121.4(7)

N(10)-C(11)-C(10)#12 122.8(7)

N(11)-C(12)-C(15) 121.4(7)

N(11)-C(13)-C(14) 122.5(7)

N(12)-C(14)-C(13) 120.5(7)

N(12)-C(15)-C(12) 120.8(7)

_____________________________________________________________

Symmetry transformations used to generate equivalent atoms:

#1 -x,y,-z+1/2 #2 -x+1/2,y+1/2,-z+1/2 #3 x-1/2,y+1/2,z

#4 x,y-1,z #5 x-1/2,y-1/2,z #6 x+1/2,y-1/2,z

#7 x+1/2,y+1/2,z #8 -x+1/2,-y+3/2,-z #9 -x,-y+2,-z

#10 -x,-y+1,-z #11 x,y+1,z #12 -x-1/2,-y+3/2,-z

Table 4. Anisotropic displacement parameters (Å2x 103) for [Cu3(CN)3(pyr)]. The anisotropic displacement factor exponent takes the form: -2p2[ h2 a*2U11 + ... + 2 h k a* b* U12 ]

______________________________________________________________________________

U11 U22 U33 U23 U13 U12

______________________________________________________________________________

Cu(1) 28(1) 11(1) 22(1) 1(1) 20(1) 2(1)

Cu(2) 32(1) 17(1) 24(1) 0 22(1) 0

Cu(3) 15(1) 28(1) 18(1) -2(1) 6(1) -1(1)

Cu(4) 16(1) 15(1) 20(1) 2(1) 7(1) 0(1)

Cu(5) 15(1) 15(1) 19(1) 1(1) 6(1) 0(1)

N(10) 12(4) 25(3) 20(3) 5(2) 8(3) 3(3)

N(11) 20(4) 22(3) 20(4) 2(2) 10(3) -1(3)

N(12) 14(4) 18(3) 20(4) 2(2) 8(3) 2(2)

N(1) 15(4) 32(4) 11(3) -7(3) 6(3) -1(3)

N(2) 15(4) 27(4) 12(3) 1(2) 7(3) 2(3)

N(3) 24(4) 10(3) 20(4) -2(2) 12(3) -2(2)

N(4) 12(5) 44(4) 14(4) 6(3) 2(3) 2(3)

N(5) 16(5) 27(3) 21(4) -4(3) 7(3) 2(3)

N(6) 15(5) 25(4) 24(4) 7(3) 7(3) 4(3)

N(7) 13(4) 24(4) 22(4) 0(3) 7(3) 1(3)

N(8) 11(4) 22(3) 18(4) 1(3) 3(3) -1(3)

N(9) 12(4) 17(3) 17(4) 2(2) 4(3) -2(2)

C(1) 15(4) 32(4) 11(3) -7(3) 6(3) -1(3)

C(2) 15(4) 27(4) 12(3) 1(2) 7(3) 2(3)

C(3) 24(4) 10(3) 20(4) -2(2) 12(3) -2(2)

C(4) 12(5) 44(4) 14(4) 6(3) 2(3) 2(3)

C(5) 16(5) 27(3) 21(4) -4(3) 7(3) 2(3)

C(6) 15(5) 25(4) 24(4) 7(3) 7(3) 4(3)

C(7) 13(4) 24(4) 22(4) 0(3) 7(3) 1(3)

C(8) 11(4) 22(3) 18(4) 1(3) 3(3) -1(3)

C(9) 12(4) 17(3) 17(4) 2(2) 4(3) -2(2)

C(10) 14(4) 34(4) 19(4) 3(3) 8(3) -1(3)

C(11) 14(4) 36(4) 19(4) 0(3) 6(3) 1(3)

C(12) 22(5) 15(3) 31(5) 8(3) 10(4) -1(3)

C(13) 23(5) 24(4) 18(4) -9(3) 9(3) 0(3)

C(14) 20(5) 15(3) 23(4) -8(3) 8(3) -1(3)

C(15) 21(5) 14(3) 25(4) 8(3) 10(3) -1(3)

______________________________________________________________________________

Table 5. Hydrogen coordinates ( x 104) and isotropic displacement parameters (Å2x 10 3) for [Cu3(CN)3(pyr)].

x y z U(eq)

H(10) -1712 9486 190 26

H(11) -1828 5516 -144 28

H(12) 5052 6014 1532 26

H(13) 5126 10010 1738 25

H(14) 6604 10026 1812 23

H(15) 6539 5999 1599 23

________________________________________________________________________
