# Supplementary material for: Solid state coordination chemistry of the copper(I)–cyano–organodiimine system. Two- and three-dimensional copper cyanide phases incorporating linear dipodal ligands
Source: Royal Society of Chemistry journal article supplement (doi:10.1039/b100390i), 2001-01-01
Supplement: b100390i-2.doc [file b100390i-2.doc]

Table 1. Crystal data and structure refinement for [Cu2(CN)2(etpyr)].

Identification code [Cu2(CN)2(etpyr)]

Empirical formula C8H8Cu2N4

# Formula weight 287.26

Temperature 115(2) K

Wavelength 0.71073 Å

Crystal system Triclinic

Space group P-1

Unit cell dimensions *a* = 7.846(3) Å = 76.400(12).

*b* = 9.048(3) Å = 88.062(10).

*c* = 14.539(6) Å  = 88.520(8).

Volume 1002.5(7) Å3

Z 4

Density (calculated) 1.903 Mg/m3

Absorption coefficient 4.204 mm-1

F(000) 568

Crystal size .22 x .14 x .05 mm3

Theta range for data collection 1.44 to 28.28.

Index ranges -10<=h<=10, -11<=k<=11, -11<=l<=19

Reflections collected 6901

Independent reflections 4683 [R(int) = 0.0608]

Completeness to theta = 28.28 94.1 %

Absorption correction SADABS

Refinement method Full-matrix least-squares on F2

Data / restraints / parameters 4683 / 0 / 254

Goodness-of-fit on F2 0.898

Final R indices [I>2sigma(I)] R1 = 0.0630, wR2 = 0.1205

R indices (all data) R1 = 0.1455, wR2 = 0.1590

Extinction coefficient 0.0070(9)

Largest diff. peak and hole 1.028 and -1.009 e.Å-3

Table 2. Atomic coordinates ( x 104) and equivalent isotropic displacement parameters (Å2x 103) for [Cu2(CN)2(etpyr)]. U(eq) is defined as one third of the trace of the orthogonalized Uij tensor.

______________________________________________________________________________

x y z U(eq)

______________________________________________________________________________

Cu(1) 2145(1) 3799(1) 6178(1) 17(1)

Cu(2) 4606(1) -1105(1) 5706(1) 15(1)

Cu(3) 11891(1) -4039(1) 8076(1) 17(1)

Cu(4) 14383(1) -9068(1) 7986(1) 17(1)

N(1) 3146(9) 1937(8) 5939(5) 16(2)

N(2) 3433(9) -2979(8) 5767(5) 18(2)

N(3) 12884(9) -2185(8) 8253(5) 17(2)

N(4) 13382(9) -7191(8) 8209(5) 20(2)

N(5) -3276(9) 1696(7) 7445(5) 14(2)

N(6) -185(8) 2982(7) 6728(5) 13(2)

N(7) 6759(8) -1937(7) 6464(5) 13(2)

N(8) 9636(8) -3183(7) 7482(5) 12(2)

C(1) 3735(11) 844(9) 5780(6) 15(2)

C(2) 2866(10) -4189(9) 5900(5) 14(2)

C(3) 13492(10) -1037(9) 8207(6) 13(2)

C(4) 12764(10) -6027(9) 8204(6) 15(2)

C(5) -3188(12) 2917(9) 6725(6) 20(2)

C(6) -1682(11) 3575(9) 6378(6) 18(2)

C(7) -266(11) 1726(9) 7431(6) 17(2)

C(8) -1786(10) 1086(9) 7808(6) 14(2)

C(9) -1851(11) -242(9) 8639(6) 17(2)

C(10) -2343(13) 216(10) 9550(6) 30(2)

C(11) 6670(11) -3165(9) 7189(6) 16(2)

C(12) 8071(10) -3813(9) 7693(6) 12(2)

C(13) 7901(11) -5150(9) 8524(6) 19(2)

C(14) 7628(17) -4661(12) 9438(7) 54(4)

C(15) 8317(11) -1317(9) 6285(6) 16(2)

C(16) 9708(10) -1938(9) 6759(6) 14(2)

______________________________________________________________________________

Table 3. Bond lengths [Å] and angles [] for [Cu2(CN)2(etpyr)].

_____________________________________________________

Cu(1)-C(2)#1 1.868(8)

Cu(1)-N(1) 1.940(7)

Cu(1)-N(6) 2.055(7)

Cu(2)-C(1) 1.900(8)

Cu(2)-N(2) 1.932(7)

Cu(2)-N(7) 2.075(7)

Cu(2)-C(1)#2 2.451(8)

Cu(2)-Cu(2)#2 2.578(2)

Cu(3)-C(4) 1.878(8)

Cu(3)-N(3) 1.941(7)

Cu(3)-N(8) 2.048(7)

Cu(4)-C(3)#3 1.883(8)

Cu(4)-N(4) 1.944(7)

Cu(4)-N(5)#4 2.045(7)

N(1)-C(1) 1.149(10)

N(2)-C(2) 1.164(10)

N(3)-C(3) 1.141(10)

N(4)-C(4) 1.147(10)

N(5)-C(5) 1.332(10)

N(5)-C(8) 1.350(11)

N(5)-Cu(4)#5 2.045(7)

N(6)-C(7) 1.339(10)

N(6)-C(6) 1.343(11)

N(7)-C(11) 1.340(10)

N(7)-C(15) 1.351(10)

N(8)-C(16) 1.349(10)

N(8)-C(12) 1.362(10)

C(1)-Cu(2)#2 2.451(8)

C(2)-Cu(1)#3 1.868(8)

C(3)-Cu(4)#1 1.883(8)

C(5)-C(6) 1.364(11)

C(7)-C(8) 1.379(11)

C(8)-C(9) 1.491(11)

C(9)-C(10) 1.513(11)

C(11)-C(12) 1.382(12)

C(12)-C(13) 1.500(10)

C(13)-C(14) 1.505(12)

C(15)-C(16) 1.348(12)

C(2)#1-Cu(1)-N(1) 133.1(3)

C(2)#1-Cu(1)-N(6) 127.7(3)

N(1)-Cu(1)-N(6) 98.9(3)

C(1)-Cu(2)-N(2) 130.3(3)

C(1)-Cu(2)-N(7) 118.1(3)

N(2)-Cu(2)-N(7) 100.4(3)

C(1)-Cu(2)-C(1)#2 108.6(3)

N(2)-Cu(2)-C(1)#2 101.1(3)

N(7)-Cu(2)-C(1)#2 90.1(3)

C(1)-Cu(2)-Cu(2)#2 64.3(2)

N(2)-Cu(2)-Cu(2)#2 131.3(2)

N(7)-Cu(2)-Cu(2)#2 110.38(19)

C(1)#2-Cu(2)-Cu(2)#2 44.3(2)

C(4)-Cu(3)-N(3) 132.5(3)

C(4)-Cu(3)-N(8) 126.8(3)

N(3)-Cu(3)-N(8) 100.1(3)

C(3)#3-Cu(4)-N(4) 130.8(3)

C(3)#3-Cu(4)-N(5)#4 129.4(3)

N(4)-Cu(4)-N(5)#4 99.8(3)

C(1)-N(1)-Cu(1) 178.7(7)

C(2)-N(2)-Cu(2) 171.0(7)

C(3)-N(3)-Cu(3) 169.3(7)

C(4)-N(4)-Cu(4) 170.3(7)

C(5)-N(5)-C(8) 117.0(7)

C(5)-N(5)-Cu(4)#5 119.1(6)

C(8)-N(5)-Cu(4)#5 123.8(5)

C(7)-N(6)-C(6) 116.3(7)

C(7)-N(6)-Cu(1) 119.9(6)

C(6)-N(6)-Cu(1) 123.7(6)

C(11)-N(7)-C(15) 115.1(7)

C(11)-N(7)-Cu(2) 120.6(5)

C(15)-N(7)-Cu(2) 124.3(5)

C(16)-N(8)-C(12) 116.0(7)

C(16)-N(8)-Cu(3) 117.4(5)

C(12)-N(8)-Cu(3) 126.4(5)

N(1)-C(1)-Cu(2) 171.4(7)

N(1)-C(1)-Cu(2)#2 117.1(6)

Cu(2)-C(1)-Cu(2)#2 71.4(3)

N(2)-C(2)-Cu(1)#3 174.4(8)

N(3)-C(3)-Cu(4)#1 173.1(8)

N(4)-C(4)-Cu(3) 173.8(7)

N(5)-C(5)-C(6) 122.7(8)

N(6)-C(6)-C(5) 121.2(8)

N(6)-C(7)-C(8) 122.9(8)

N(5)-C(8)-C(7) 120.0(8)

N(5)-C(8)-C(9) 118.1(7)

C(7)-C(8)-C(9) 121.9(8)

C(8)-C(9)-C(10) 112.4(7)

N(7)-C(11)-C(12) 123.3(8)

N(8)-C(12)-C(11) 120.2(7)

N(8)-C(12)-C(13) 118.2(7)

C(11)-C(12)-C(13) 121.5(7)

C(12)-C(13)-C(14) 111.7(7)

C(16)-C(15)-N(7) 122.6(8)

C(15)-C(16)-N(8) 122.6(8)

_____________________________________________________________

Symmetry transformations used to generate equivalent atoms:

#1 x,y+1,z #2 -x+1,-y,-z+1 #3 x,y-1,z #4 x+2,y-1,z

#5 x-2,y+1,z

Table 4. Anisotropic displacement parameters (Å2x 103) for [Cu2(CN)2(etpyr)]. The anisotropic displacement factor exponent takes the form: -2p2[ h2 a*2U11 + ... + 2 h k a* b* U12 ]

______________________________________________________________________________

U11 U22 U33 U23 U13 U12

______________________________________________________________________________

Cu(1) 16(1) 10(1) 24(1) -5(1) 3(1) 0(1)

Cu(2) 16(1) 8(1) 21(1) -3(1) -1(1) 2(1)

Cu(3) 18(1) 10(1) 21(1) -4(1) -1(1) 2(1)

Cu(4) 14(1) 11(1) 26(1) -6(1) 2(1) 0(1)

N(1) 17(4) 15(4) 16(4) -3(3) 5(3) -6(3)

N(2) 15(4) 20(4) 18(4) -3(3) 2(3) 0(3)

N(3) 14(4) 17(4) 24(4) -12(3) -3(3) 0(3)

N(4) 19(4) 14(4) 26(5) -1(3) -2(3) 3(3)

N(5) 16(4) 7(3) 21(4) -6(3) 3(3) 0(3)

N(6) 14(4) 14(4) 12(4) -8(3) 2(3) 3(3)

N(7) 9(4) 13(3) 18(4) -7(3) 4(3) 4(3)

N(8) 13(4) 4(3) 18(4) 0(3) 4(3) 6(3)

C(1) 18(5) 17(4) 9(5) -4(4) 1(3) 1(4)

C(2) 15(5) 19(4) 7(4) -6(3) 4(3) -1(4)

C(3) 13(4) 12(4) 17(5) -9(3) -2(3) 10(3)

C(4) 13(5) 16(4) 11(5) 8(3) 0(3) 5(4)

C(5) 20(5) 16(4) 25(5) -5(4) -6(4) 1(4)

C(6) 20(5) 14(4) 20(5) -3(4) -5(4) 0(4)

C(7) 16(5) 11(4) 24(5) -7(4) 2(4) 1(3)

C(8) 16(5) 15(4) 14(5) -10(3) 3(3) 7(3)

C(9) 18(5) 15(4) 19(5) -2(4) -1(4) 1(4)

C(10) 38(6) 27(5) 21(6) 0(4) 10(5) 5(5)

C(11) 14(5) 11(4) 23(5) -4(4) 0(4) 4(3)

C(12) 15(5) 11(4) 13(5) -6(3) 6(3) -2(3)

C(13) 20(5) 10(4) 23(5) 3(4) 0(4) -1(3)

C(14) 112(12) 30(6) 21(6) -6(5) 7(6) -5(7)

C(15) 23(5) 8(4) 17(5) -6(3) 4(4) 3(4)

C(16) 7(4) 17(4) 19(5) -6(4) 4(3) -2(3)

______________________________________________________________________________

Table 5. Hydrogen coordinates ( x 104) and isotropic displacement parameters (Å2x 10 3)

for [Cu2(CN)2(etpyr)].

x y z U(eq)

________________________________________________________________________

H(5) -4194 3337 6448 24

H(6) -1691 4449 5891 22

H(7) 748 1265 7675 20

H(9A) -742 -749 8705 21

H(9B) -2671 -960 8528 21

H(10A) -2365 -672 10064 45

H(10B) -3452 697 9494 45

H(10C) -1524 913 9670 45

H(11) 5612 -3602 7360 19

H(13A) 8925 -5783 8560 22

H(13B) 6946 -5755 8432 22

H(14A) 7522 -5543 9953 82

H(14B) 6605 -4048 9409 82

H(14C) 8582 -4079 9537 82

H(15) 8436 -425 5817 19

H(16) 10759 -1491 6580 17

________________________________________________________________________
