# Supplementary material for: Solid state coordination chemistry of the copper(I)–cyano–organodiimine system. Two- and three-dimensional copper cyanide phases incorporating linear dipodal ligands
Source: Royal Society of Chemistry journal article supplement (doi:10.1039/b100390i), 2001-01-01
Supplement: b100390i-3.doc [file b100390i-3.doc]

Table 1. Crystal data and structure refinement for [Cu2(CN)2(tmp)].

Identification code [Cu2(CN)2(tmp)]

Empirical formula C10H12Cu2N4

Formula weight 315.32

Temperature 115(2) K

Wavelength 0.71073 Å

Crystal system Monoclinic

# Space group P2(1)/n

Unit cell dimensions *a* = 4.7242(11) Å = 90.

*b* = 16.731(4) Å = 94.020(5).

*c* = 7.4798(17) Å  = 90.

Volume 589.7(2) Å3

Z 2

Density (calculated) 1.776 Mg/m3

Absorption coefficient 3.582 mm-1

F(000) 316

Crystal size 0.29 x 0.23 x 0.19 mm3

Theta range for data collection 2.43 to 28.25.

Index ranges -5<=h<=6, -11<=k<=22, -9<=l<=9

Reflections collected 3800

Independent reflections 1406 [R(int) = 0.0341]

Completeness to theta = 28.25 96.0 %

Absorption correction SADABS

Refinement method Full-matrix least-squares on F2

Data / restraints / parameters 1406 / 0 / 74

Goodness-of-fit on F2 1.051

Final R indices [I>2sigma(I)] R1 = 0.0414, wR2 = 0.0906

R indices (all data) R1 = 0.0552, wR2 = 0.0962

Extinction coefficient 0.005(2)

Largest diff. peak and hole 0.940 and -0.611 e.Å-3

Table 2. Atomic coordinates ( x 104) and equivalent isotropic displacement parameters (Å2x 103) for [Cu2(CN)2(tmp)]. U(eq) is defined as one third of the trace of the orthogonalized Uij tensor.

______________________________________________________________________________

x y z U(eq)

______________________________________________________________________________

Cu(1) 1435(1) 1931(1) 3665(1) 14(1)

N(3) 816(6) 731(2) 4330(4) 11(1)

N(1) 3370(8) 2296(2) 1708(5) 22(1)

N(2) -503(7) 2444(2) 5524(4) 12(1)

C(1) 3370(8) 2296(2) 1708(5) 22(1)

C(2) -503(7) 2444(2) 5524(4) 12(1)

C(3) 4183(8) 971(2) 6909(5) 16(1)

C(4) 1978(7) 457(2) 5906(4) 12(1)

C(5) -1119(7) 280(2) 3411(4) 11(1)

C(6) -2353(8) 587(2) 1629(5) 17(1)

______________________________________________________________________________

Table 3. Bond lengths [Å] and angles [] for [Cu2(CN)2(tmp)].

_____________________________________________________

Cu(1)-N(1) 1.881(4)

Cu(1)-N(2) 1.920(3)

Cu(1)-N(3) 2.093(3)

N(3)-C(5) 1.338(4)

N(3)-C(4) 1.345(4)

N(1)-C(2)#1 1.151(5)

N(1)-N(2)#1 1.151(5)

N(2)-C(1)#2 1.151(5)

N(2)-N(1)#2 1.151(5)

C(3)-C(4) 1.509(5)

C(4)-C(5)#3 1.406(5)

C(5)-C(4)#3 1.406(5)

C(5)-C(6) 1.507(5)

N(1)-Cu(1)-N(2) 134.49(14)

N(1)-Cu(1)-N(3) 125.44(13)

N(2)-Cu(1)-N(3) 100.06(12)

C(5)-N(3)-C(4) 118.7(3)

C(5)-N(3)-Cu(1) 121.4(2)

C(4)-N(3)-Cu(1) 118.7(2)

C(2)#1-N(1)-N(2)#1 0.0(3)

C(2)#1-N(1)-Cu(1) 176.6(3)

N(2)#1-N(1)-Cu(1) 176.6(3)

C(1)#2-N(2)-N(1)#2 0.0(3)

C(1)#2-N(2)-Cu(1) 175.3(3)

N(1)#2-N(2)-Cu(1) 175.3(3)

N(3)-C(4)-C(5)#3 120.4(3)

N(3)-C(4)-C(3) 117.8(3)

C(5)#3-C(4)-C(3) 121.7(3)

N(3)-C(5)-C(4)#3 120.8(3)

N(3)-C(5)-C(6) 118.1(3)

C(4)#3-C(5)-C(6) 121.1(3)

_____________________________________________________________

Symmetry transformations used to generate equivalent atoms:

#1 x+1/2,-y+1/2,z-1/2 #2 x-1/2,-y+1/2,z+1/2

#3 -x,-y,-z+1

Table 4. Anisotropic displacement parameters (Å2x 103) for [Cu2(CN)2(tmp)]. The anisotropic displacement factor exponent takes the form: -2p2[ h2 a*2U11 + ... + 2 h k a* b* U12 ]

______________________________________________________________________________

U11 U22 U33 U23 U13 U12

______________________________________________________________________________

Cu(1) 20(1) 9(1) 13(1) 1(1) 8(1) 0(1)

N(3) 13(1) 6(1) 13(1) -1(1) 4(1) 1(1)

N(1) 27(2) 11(2) 27(2) -1(1) 6(2) 5(1)

N(2) 18(2) 5(1) 13(2) -1(1) 7(1) -1(1)

C(1) 27(2) 11(2) 27(2) -1(1) 6(2) 5(1)

C(2) 18(2) 5(1) 13(2) -1(1) 7(1) -1(1)

C(3) 19(2) 12(2) 18(2) -1(1) 1(1) -4(1)

C(4) 16(2) 9(2) 12(2) -1(1) 3(1) 1(1)

C(5) 12(2) 10(2) 12(2) -1(1) 5(1) 4(1)

C(6) 24(2) 11(2) 15(2) 1(1) -1(1) -1(1)

______________________________________________________________________________

Table 5. Hydrogen coordinates ( x 104) and isotropic displacement parameters (Å2x 10 3)

for [Cu2(CN)2(tmp)].

______________________________________________________________________________

x y z U(eq)

______________________________________________________________________________

H(3A) 4487 1447 6231 25

H(3B) 5930 679 7079 25

H(3C) 3535 1114 8054 25

H(6A) -1518 1094 1381 25

H(6B) -4369 648 1667 25

H(6C) -1960 214 704 25

______________________________________________________________________________
