# Supplementary material for: Solid state coordination chemistry of the copper(I)–cyano–organodiimine system. Two- and three-dimensional copper cyanide phases incorporating linear dipodal ligands
Source: Royal Society of Chemistry journal article supplement (doi:10.1039/b100390i), 2001-01-01
Supplement: b100390i-4.doc [file b100390i-4.doc]

Table 1. Crystal data and structure refinement for [Cu2(CN)2(qox)].

Identification code [Cu2(CN)2(qox)]

Empirical formula C20H12Cu4N8

Formula weight 618.54

Temperature 115(2) K

Wavelength 0.71073 Å

Crystal system Triclinic

Space group P-1

Unit cell dimensions *a* = 6.8433(14) Å = 83.894(5).

*b* = 9.6049(19) Å = 81.517(5).

*c* = 15.589(3) Å  = 71.436(5).

Volume 958.8(3) Å3

Z 2

Density (calculated) 2.142 Mg/m3

Absorption coefficient 4.404 mm-1

F(000) 608

Crystal size 0.11 x 0.09 x 0.05 mm3

Theta range for data collection 1.32 to 28.27.

Index ranges -8<=h<=7, -11<=k<=12, -20<=l<=18

Reflections collected 6175

Independent reflections 4247 [R(int) = 0.0345]

Completeness to theta = 28.27 89.3 %

Absorption correction SADABS

Refinement method Full-matrix least-squares on F2

Data / restraints / parameters 4247 / 0 / 290

Goodness-of-fit on F2 0.984

Final R indices [I>2sigma(I)] R1 = 0.0498, wR2 = 0.1136

R indices (all data) R1 = 0.0718, wR2 = 0.1236

Extinction coefficient 0.0005(5)

Largest diff. peak and hole 0.968 and -1.062 e.Å-3

Table 2. Atomic coordinates ( x 104) and equivalent isotropic displacement parameters (Å2x 103) for [Cu2(CN)2(qox)]. U(eq) is defined as one third of the trace of the orthogonalized Uij tensor.

______________________________________________________________________________

x y z U(eq)

______________________________________________________________________________

Cu(1) -1892(1) 9801(1) 5577(1) 14(1)

Cu(2) 1464(1) 5971(1) 3517(1) 12(1)

Cu(3) 3720(1) 4052(1) 583(1) 13(1)

Cu(4) 9738(1) -2364(1) -1483(1) 13(1)

N(9) -4095(7) 11619(5) 5104(3) 11(1)

N(10) -6844(6) 14112(5) 4293(3) 9(1)

N(11) 5677(7) 2133(5) 88(3) 10(1)

N(12) 8041(6) -489(4) -724(3) 8(1)

N(1) -1453(8) 8996(5) 6723(3) 16(1)

N(2) -746(7) 8670(5) 4537(3) 10(1)

N(3) -1(8) 7717(6) 4088(3) 16(1)

N(4) 2285(7) 5199(5) 2394(3) 8(1)

N(5) 2803(8) 4704(5) 1721(4) 19(1)

N(6) 2609(7) 5141(5) -476(3) 10(1)

N(7) 8929(7) -1528(5) -2600(3) 9(1)

N(8) 11541(8) -3961(6) -910(3) 16(1)

C(1) -1453(8) 8996(5) 6723(3) 16(1)

C(2) -746(7) 8670(5) 4537(3) 10(1)

C(3) -1(8) 7717(6) 4088(3) 16(1)

C(4) 2285(7) 5199(5) 2394(3) 8(1)

C(5) 2803(8) 4704(5) 1721(4) 19(1)

C(6) 2609(7) 5141(5) -476(3) 10(1)

C(7) 8929(7) -1528(5) -2600(3) 9(1)

C(8) 11541(8) -3961(6) -910(3) 16(1)

C(9) -4333(8) 11712(6) 4276(3) 11(1)

C(10) -5678(8) 12931(6) 3870(3) 12(1)

C(11) -6680(7) 14047(5) 5166(3) 9(1)

C(12) -7904(8) 15221(5) 5671(3) 11(1)

C(13) -7730(8) 15146(6) 6546(3) 10(1)

C(14) -6372(8) 13921(6) 6947(3) 12(1)

C(15) -5164(8) 12761(6) 6472(3) 11(1)

C(16) -5300(7) 12805(5) 5575(3) 8(1)

C(17) 5998(8) 2055(6) -760(3) 9(1)

C(18) 7175(8) 754(6) -1168(3) 11(1)

C(19) 7803(8) -445(5) 168(3) 10(1)

C(20) 8722(8) -1716(5) 687(3) 10(1)

C(21) 8505(8) -1659(6) 1572(3) 11(1)

C(22) 7383(8) -337(6) 1979(3) 14(1)

C(23) 6444(8) 896(6) 1489(3) 12(1)

C(24) 6650(8) 880(5) 579(3) 8(1)

______________________________________________________________________________

Table 3. Bond lengths [Å] and angles [] for [Cu2(CN)2(qox)].

_____________________________________________________

Cu(1)-N(1) 1.896(5)

Cu(1)-N(2) 1.970(4)

Cu(1)-N(9) 2.060(4)

Cu(1)-Cu(1)#1 3.0324(14)

Cu(2)-N(3) 1.895(5)

Cu(2)-N(4) 1.911(4)

Cu(2)-N(10)#2 2.152(4)

Cu(3)-N(5) 1.895(6)

Cu(3)-N(6) 1.974(5)

Cu(3)-N(11) 2.052(4)

Cu(4)-N(8) 1.872(5)

Cu(4)-N(7) 1.920(4)

Cu(4)-N(12) 2.170(4)

N(9)-C(9) 1.315(6)

N(9)-C(16) 1.384(6)

N(10)-C(10) 1.336(7)

N(10)-C(11) 1.376(6)

N(10)-Cu(2)#3 2.152(4)

N(11)-C(17) 1.314(6)

N(11)-C(24) 1.386(6)

N(12)-C(18) 1.323(6)

N(12)-C(19) 1.379(6)

N(1)-C(7)#4 1.150(7)

N(1)-N(7)#4 1.150(7)

N(2)-N(3) 1.150(7)

N(4)-N(5) 1.159(7)

N(6)-C(8)#3 1.164(7)

N(6)-N(8)#3 1.164(7)

N(7)-C(1)#5 1.150(7)

N(7)-N(1)#5 1.150(7)

N(8)-C(6)#2 1.164(7)

N(8)-N(6)#2 1.164(7)

C(9)-C(10) 1.395(7)

C(11)-C(12) 1.409(7)

C(11)-C(16) 1.421(7)

C(12)-C(13) 1.378(7)

C(13)-C(14) 1.399(7)

C(14)-C(15) 1.372(7)

C(15)-C(16) 1.410(7)

C(17)-C(18) 1.411(7)

C(19)-C(20) 1.412(7)

C(19)-C(24) 1.427(7)

C(20)-C(21) 1.370(7)

C(21)-C(22) 1.419(7)

C(22)-C(23) 1.367(7)

C(23)-C(24) 1.406(7)

N(1)-Cu(1)-N(2) 123.4(2)

N(1)-Cu(1)-N(9) 132.10(19)

N(2)-Cu(1)-N(9) 102.33(18)

N(1)-Cu(1)-Cu(1)#1 115.87(16)

N(2)-Cu(1)-Cu(1)#1 59.35(14)

N(9)-Cu(1)-Cu(1)#1 98.29(12)

N(3)-Cu(2)-N(4) 142.6(2)

N(3)-Cu(2)-N(10)#2 117.31(19)

N(4)-Cu(2)-N(10)#2 99.74(17)

N(5)-Cu(3)-N(6) 124.4(2)

N(5)-Cu(3)-N(11) 134.1(2)

N(6)-Cu(3)-N(11) 101.12(18)

N(8)-Cu(4)-N(7) 144.2(2)

N(8)-Cu(4)-N(12) 116.64(19)

N(7)-Cu(4)-N(12) 98.53(17)

C(9)-N(9)-C(16) 116.2(4)

C(9)-N(9)-Cu(1) 118.1(3)

C(16)-N(9)-Cu(1) 125.6(3)

C(10)-N(10)-C(11) 116.0(4)

C(10)-N(10)-Cu(2)#3 116.7(3)

C(11)-N(10)-Cu(2)#3 127.1(3)

C(17)-N(11)-C(24) 116.6(4)

C(17)-N(11)-Cu(3) 118.1(3)

C(24)-N(11)-Cu(3) 125.2(3)

C(18)-N(12)-C(19) 116.6(4)

C(18)-N(12)-Cu(4) 116.3(3)

C(19)-N(12)-Cu(4) 127.2(3)

C(7)#4-N(1)-N(7)#4 0.0(5)

C(7)#4-N(1)-Cu(1) 176.1(5)

N(7)#4-N(1)-Cu(1) 176.1(5)

N(3)-N(2)-Cu(1) 162.5(4)

N(2)-N(3)-Cu(2) 170.0(5)

N(5)-N(4)-Cu(2) 178.7(5)

N(4)-N(5)-Cu(3) 174.7(5)

C(8)#3-N(6)-N(8)#3 0.0(9)

C(8)#3-N(6)-Cu(3) 159.3(4)

N(8)#3-N(6)-Cu(3) 159.3(4)

C(1)#5-N(7)-N(1)#5 0.0(6)

C(1)#5-N(7)-Cu(4) 176.0(4)

N(1)#5-N(7)-Cu(4) 176.0(4)

C(6)#2-N(8)-N(6)#2 0.0(5)

C(6)#2-N(8)-Cu(4) 172.6(4)

N(6)#2-N(8)-Cu(4) 172.6(4)

N(9)-C(9)-C(10) 123.4(5)

N(10)-C(10)-C(9) 122.7(5)

N(10)-C(11)-C(12) 120.0(5)

N(10)-C(11)-C(16) 121.1(4)

C(12)-C(11)-C(16) 119.0(5)

C(13)-C(12)-C(11) 119.6(5)

C(12)-C(13)-C(14) 121.4(5)

C(15)-C(14)-C(13) 120.3(5)

C(14)-C(15)-C(16) 119.7(5)

N(9)-C(16)-C(15) 119.2(5)

N(9)-C(16)-C(11) 120.7(5)

C(15)-C(16)-C(11) 120.1(5)

N(11)-C(17)-C(18) 122.9(5)

N(12)-C(18)-C(17) 122.5(5)

N(12)-C(19)-C(20) 120.1(4)

N(12)-C(19)-C(24) 120.9(5)

C(20)-C(19)-C(24) 119.0(5)

C(21)-C(20)-C(19) 119.8(5)

C(20)-C(21)-C(22) 121.1(5)

C(23)-C(22)-C(21) 119.9(5)

C(22)-C(23)-C(24) 120.4(5)

N(11)-C(24)-C(23) 119.9(4)

N(11)-C(24)-C(19) 120.3(4)

C(23)-C(24)-C(19) 119.7(5)

_____________________________________________________________

Symmetry transformations used to generate equivalent atoms:

#1 -x,-y+2,-z+1 #2 x+1,y-1,z #3 x-1,y+1,z

#4 x-1,y+1,z+1 #5 x+1,y-1,z-1

Table 4. Anisotropic displacement parameters (Å2x 103) for [Cu2(CN)2(qox)]. The anisotropic displacement factor exponent takes the form: -2p2[ h2 a*2U11 + ... + 2 h k a* b* U12 ]

______________________________________________________________________________

U11 U22 U33 U23 U13 U12

______________________________________________________________________________

Cu(1) 18(1) 9(1) 10(1) -2(1) -5(1) 3(1)

Cu(2) 12(1) 10(1) 10(1) -3(1) -2(1) 3(1)

Cu(3) 15(1) 10(1) 9(1) -4(1) -2(1) 3(1)

Cu(4) 13(1) 10(1) 10(1) -1(1) -4(1) 3(1)

N(9) 9(2) 11(2) 11(2) -3(2) -1(2) 0(2)

N(10) 10(2) 9(2) 7(2) -2(2) 0(2) -3(2)

N(11) 9(2) 9(2) 9(2) -2(2) 0(2) -1(2)

N(12) 9(2) 3(2) 9(2) -4(2) -1(2) 1(2)

N(1) 14(3) 13(2) 18(3) -5(2) 0(2) -1(2)

N(2) 13(2) 4(2) 8(2) -4(2) 1(2) 3(2)

N(3) 11(2) 18(3) 16(3) 9(2) -9(2) -3(2)

N(4) 7(2) 6(2) 8(2) -3(2) -4(2) 4(2)

N(5) 17(3) 9(2) 26(3) 4(2) -5(2) -1(2)

N(6) 11(2) 9(2) 7(2) -2(2) -2(2) 4(2)

N(7) 14(2) 7(2) 3(2) 0(2) -3(2) 1(2)

N(8) 18(3) 17(3) 12(2) -5(2) 4(2) -5(2)

C(1) 14(3) 13(2) 18(3) -5(2) 0(2) -1(2)

C(2) 13(2) 4(2) 8(2) -4(2) 1(2) 3(2)

C(3) 11(2) 18(3) 16(3) 9(2) -9(2) -3(2)

C(4) 7(2) 6(2) 8(2) -3(2) -4(2) 4(2)

C(5) 17(3) 9(2) 26(3) 4(2) -5(2) -1(2)

C(6) 11(2) 9(2) 7(2) -2(2) -2(2) 4(2)

C(7) 14(2) 7(2) 3(2) 0(2) -3(2) 1(2)

C(8) 18(3) 17(3) 12(2) -5(2) 4(2) -5(2)

C(9) 13(3) 10(2) 10(3) -2(2) -1(2) -2(2)

C(10) 14(3) 12(3) 10(3) 3(2) -5(2) -2(2)

C(11) 7(2) 9(2) 8(2) -1(2) 0(2) -1(2)

C(12) 7(2) 5(2) 16(3) 2(2) -2(2) 2(2)

C(13) 9(2) 11(2) 9(2) -7(2) 2(2) -1(2)

C(14) 13(3) 16(3) 6(2) -3(2) 3(2) -5(2)

C(15) 8(2) 7(2) 15(3) -3(2) -2(2) 2(2)

C(16) 4(2) 8(2) 10(2) 1(2) -2(2) -1(2)

C(17) 9(2) 8(2) 10(2) -3(2) -2(2) -1(2)

C(18) 14(3) 12(3) 5(2) 0(2) 1(2) -4(2)

C(19) 8(2) 8(2) 12(2) -1(2) -2(2) 0(2)

C(20) 11(3) 5(2) 11(2) 3(2) -3(2) -1(2)

C(21) 8(2) 9(2) 15(3) 2(2) -4(2) 0(2)

C(22) 15(3) 21(3) 7(2) -4(2) 2(2) -6(2)

C(23) 14(3) 16(3) 4(2) -3(2) 1(2) -5(2)

C(24) 9(2) 8(2) 6(2) -1(2) 4(2) -1(2)

______________________________________________________________________________

Table 5. Hydrogen coordinates ( x 104) and isotropic displacement parameters (Å2x 10 3)

for [Cu2(CN)2(qox)].

______________________________________________________________________________

x y z U(eq)

______________________________________________________________________________

H(9) -3565 10926 3944 13

H(10) -5766 12921 3281 15

H(12) -8822 16041 5416 13

H(13) -8532 15926 6876 12

H(14) -6287 13893 7539 14

H(15) -4260 11950 6740 13

H(17) 5424 2894 -1107 11

H(18) 7350 771 -1771 13

H(20) 9472 -2590 430 12

H(21) 9104 -2502 1911 13

H(22) 7287 -309 2579 17

H(23) 5664 1752 1758 14

______________________________________________________________________________
