# Supplementary material for: Solid state coordination chemistry of the copper(I)–cyano–organodiimine system. Two- and three-dimensional copper cyanide phases incorporating linear dipodal ligands
Source: Royal Society of Chemistry journal article supplement (doi:10.1039/b100390i), 2001-01-01
Supplement: b100390i-5.doc [file b100390i-5.doc]

Table 1. Crystal data and structure refinement for [Cu2(CN)2(phenz)].

Identification code [Cu2(CN)2(phenz)]

Empirical formula C14H8Cu2N4

Formula weight 359.32

Temperature 115(2) K

Wavelength 0.71073 Å

Crystal system Orthorhombic

Space group Cmca

Unit cell dimensions *a* = 16.869(7) Å = 90.

*b* = 8.265(3) Å = 90.

*c* = 9.489(3) Å  = 90.

Volume 1323.0(9) Å3

Z 4

Density (calculated) 1.804 Mg/m3

Absorption coefficient 3.206 mm-1

F(000) 712

Crystal size 0.13 x 0.11 x 0.10 mm3

Theta range for data collection 2.41 to 28.28.

Index ranges -21<=h<=21, -10<=k<=10, -9<=l<=12

Reflections collected 3919

Independent reflections 837 [R(int) = 0.0328]

Completeness to theta = 28.28 98.2 %

Absorption correction SADABS

Refinement method Full-matrix least-squares on F2

Data / restraints / parameters 837 / 0 / 48

Goodness-of-fit on F2 1.093

Final R indices [I>2sigma(I)] R1 = 0.0304, wR2 = 0.0627

R indices (all data) R1 = 0.0429, wR2 = 0.0676

Extinction coefficient 0.0006(3)

Largest diff. peak and hole 0.405 and -0.332 e.Å-3

Table 2. Atomic coordinates ( x 104) and equivalent isotropic displacement parameters (Å2x 103) for [Cu2(CN)2(phenz)]. U(eq) is defined as one third of the trace of the orthogonalized Uij tensor.

______________________________________________________________________________

x y z U(eq)

______________________________________________________________________________

Cu(1) 2901(1) 0 5000 15(1)

N(2) 4160(1) 0 5000 12(1)

C(1) 2580(1) -51(3) 6906(2) 17(1)

N(1) 2580(1) -51(3) 6906(2) 17(1)

C(2) 4573(1) 1290(3) 5471(2) 12(1)

C(3) 4165(1) 2672(3) 5988(2) 15(1)

C(4) 4576(1) 3965(3) 6476(2) 17(1)

______________________________________________________________________________

Table 3. Bond lengths [Å] and angles [] for [Cu2(CN)2(phenz)].

_____________________________________________________

Cu(1)-N(1)#1 1.888(2)

Cu(1)-C(1)#1 1.888(2)

Cu(1)-C(1) 1.888(2)

Cu(1)-N(2) 2.124(3)

N(2)-C(2)#1 1.350(2)

N(2)-C(2) 1.350(2)

C(1)-N(1)#2 1.159(4)

C(1)-C(1)#2 1.159(4)

C(2)-C(3) 1.421(3)

C(2)-C(2)#3 1.440(4)

C(3)-C(4) 1.356(3)

C(4)-C(4)#3 1.432(5)

N(1)#1-Cu(1)-C(1)#1 0.00(12)

N(1)#1-Cu(1)-C(1) 146.68(13)

C(1)#1-Cu(1)-C(1) 146.68(13)

N(1)#1-Cu(1)-N(2) 106.66(6)

C(1)#1-Cu(1)-N(2) 106.66(6)

C(1)-Cu(1)-N(2) 106.66(6)

C(2)#1-N(2)-C(2) 117.8(3)

C(2)#1-N(2)-Cu(1) 121.10(13)

C(2)-N(2)-Cu(1) 121.10(13)

N(1)#2-C(1)-C(1)#2 0.0(3)

N(1)#2-C(1)-Cu(1) 176.5(2)

C(1)#2-C(1)-Cu(1) 176.5(2)

N(2)-C(2)-C(3) 119.9(2)

N(2)-C(2)-C(2)#3 121.10(13)

C(3)-C(2)-C(2)#3 119.02(12)

C(4)-C(3)-C(2) 120.2(2)

C(3)-C(4)-C(4)#3 120.76(13)

_____________________________________________________________

Symmetry transformations used to generate equivalent atoms:

#1 x,-y,-z+1 #2 -x+1/2,y+0,-z+3/2 #3 -x+1,y,z

Table 4. Anisotropic displacement parameters (Å2x 103) for [Cu2(CN)2(phenz)]. The anisotropic displacement factor exponent takes the form: -2p2[ h2 a*2U11 + ... + 2 h k a* b* U12 ]

______________________________________________________________________________

U11 U22 U33 U23 U13 U12

______________________________________________________________________________

Cu(1) 11(1) 21(1) 13(1) 0(1) 0 0

N(2) 11(1) 15(1) 11(1) 1(1) 0 0

C(1) 10(1) 23(1) 16(1) 1(1) 0(1) -1(1)

N(1) 10(1) 23(1) 16(1) 1(1) 0(1) -1(1)

C(2) 11(1) 15(1) 9(1) 1(1) 1(1) -1(1)

C(3) 13(1) 19(1) 14(1) -1(1) 1(1) 3(1)

C(4) 19(1) 17(1) 14(1) -3(1) 1(1) 4(1)

______________________________________________________________________________

Table 5. Hydrogen coordinates ( x 104) and isotropic displacement parameters (Å2x 10 3)

for [Cu2(CN)2(phenz)].

______________________________________________________________________________

x y z U(eq)

______________________________________________________________________________

H(3) 3613 2689 5991 18

H(4) 4303 4862 6815 20

______________________________________________________________________________
