# Supplementary material for: Solid state coordination chemistry of the copper(I)–cyano–organodiimine system. Two- and three-dimensional copper cyanide phases incorporating linear dipodal ligands
Source: Royal Society of Chemistry journal article supplement (doi:10.1039/b100390i), 2001-01-01
Supplement: b100390i-6.doc [file b100390i-6.doc]

Table 1. Crystal data and structure refinement for [Cu7(CN)7(4,4'-bpy)2].

Identification code [Cu7(CN)7(4,4'-bpy)2]

Empirical formula C27H16Cu7N11

Formula weight 939.29

Temperature 115(2) K

Wavelength 0.71073 Å

Crystal system Triclinic

Space group 2

Unit cell dimensions *a* = 7.901(2) Å = 82.367(9).

*b* = 8.367(2) Å = 74.775(6).

*c* = 11.814(3) Å  = 86.046(5).

Volume 746.4(3) Å3

Z 1

Density (calculated) 2.090 Mg/m3

Absorption coefficient 4.930 mm-1

F(000) 458

Crystal size 0.29 x 0.14 x 0.06 mm3

Theta range for data collection 1.80 to 25.00.

Index ranges -8<=h<=9, -8<=k<=9, -14<=l<=13

Reflections collected 3950

Independent reflections 2532 [R(int) = 0.0303]

Completeness to theta = 25.00 96.5 %

Absorption correction SADABS

Refinement method Full-matrix least-squares on F2

Data / restraints / parameters 2532 / 0 / 205

Goodness-of-fit on F2 1.043

Final R indices [I>2sigma(I)] R1 = 0.0650, wR2 = 0.1543

R indices (all data) R1 = 0.0867, wR2 = 0.1681

Largest diff. peak and hole 2.061 and -1.274 e.Å-3

Table 2. Atomic coordinates ( x 104) and equivalent isotropic displacement parameters (Å2x 103) for [Cu7(CN)7(4,4'-bpy)2]. U(eq) is defined as one third of the trace of the orthogonalized Uij tensor.

______________________________________________________________________________

x y z U(eq)

______________________________________________________________________________

Cu(1) 2583(2) 14086(2) 6697(1) 49(1)

Cu(2) 0 10000 10000 44(1)

Cu(3) 3320(2) 8097(1) 9336(1) 26(1)

Cu(4) 1406(1) 6894(1) 5890(1) 21(1)

N(8) 1986(9) 8868(8) 4644(6) 21(2)

N(9) 3085(10) 16030(8) 521(6) 29(2)

C(1) 4447(11) 14770(12) 5406(8) 39(2)

N(1) 4447(11) 14770(12) 5406(8) 39(2)

C(2) 1368(13) 12671(11) 7974(9) 43(2)

N(2) 1368(13) 12671(11) 7974(9) 43(2)

C(3) 752(13) 11628(12) 8809(9) 43(2)

N(3) 752(13) 11628(12) 8809(9) 43(2)

C(4) 4577(11) 9585(9) 9842(7) 27(2)

N(4) 4577(11) 9585(9) 9842(7) 27(2)

C(5) 2495(10) 7630(9) 8070(6) 21(2)

N(5) 2495(10) 7630(9) 8070(6) 21(2)

C(6) 2055(10) 7286(9) 7264(7) 26(2)

N(6) 2055(10) 7286(9) 7264(7) 26(2)

C(7) 329(10) 5413(9) 5223(6) 23(2)

N(7) 329(10) 5413(9) 5223(6) 23(2)

C(8) 2699(12) 10182(10) 4838(7) 27(2)

C(9) 2984(12) 11567(11) 4060(7) 28(2)

C(10) 2514(11) 11673(9) 2983(7) 19(2)

C(11) 1798(13) 10303(10) 2778(7) 28(2)

C(12) 1569(11) 8955(9) 3608(7) 22(2)

C(13) 2757(11) 13171(10) 2128(7) 20(2)

C(14) 3486(12) 14537(10) 2324(7) 26(2)

C(15) 3646(13) 15911(11) 1511(8) 32(2)

C(16) 2196(12) 13293(10) 1091(7) 27(2)

C(17) 2363(12) 14705(11) 331(7) 29(2)

______________________________________________________________________________

Table 3. Bond lengths [Å] and angles [] for [Cu7(CN)7(4,4'-bpy)2].

_____________________________________________________

Cu(1)-C(2) 1.877(11)

Cu(1)-C(1) 1.878(10)

Cu(1)-Cu(4)#1 2.6191(18)

Cu(2)-N(3)#2 1.831(11)

Cu(2)-C(3)#2 1.831(11)

Cu(2)-C(3) 1.831(11)

Cu(2)-Cu(3)#2 2.9501(13)

Cu(2)-Cu(3) 2.9501(13)

Cu(3)-C(5) 1.875(7)

Cu(3)-C(4) 1.891(8)

Cu(3)-N(9)#3 2.062(7)

Cu(4)-C(6) 1.899(8)

Cu(4)-C(7) 1.907(7)

Cu(4)-N(8) 2.052(7)

Cu(4)-Cu(1)#4 2.6191(18)

N(8)-C(8) 1.341(11)

N(8)-C(12) 1.341(10)

N(9)-C(15) 1.346(11)

N(9)-C(17) 1.351(11)

N(9)-Cu(3)#5 2.062(7)

C(1)-N(1)#6 1.157(19)

C(1)-C(1)#6 1.157(19)

C(2)-C(3) 1.244(14)

C(4)-N(4)#7 1.154(15)

C(4)-C(4)#7 1.154(15)

C(5)-C(6) 1.171(11)

C(7)-N(7)#8 1.147(15)

C(7)-C(7)#8 1.147(15)

C(8)-C(9) 1.372(12)

C(9)-C(10) 1.407(11)

C(10)-C(11) 1.389(12)

C(10)-C(13) 1.490(11)

C(11)-C(12) 1.380(11)

C(13)-C(14) 1.386(11)

C(13)-C(16) 1.398(11)

C(14)-C(15) 1.386(12)

C(16)-C(17) 1.378(12)

C(2)-Cu(1)-C(1) 156.3(4)

C(2)-Cu(1)-Cu(4)#1 126.4(3)

C(1)-Cu(1)-Cu(4)#1 77.3(3)

N(3)#2-Cu(2)-C(3)#2 0.0(8)

N(3)#2-Cu(2)-C(3) 180.000(2)

C(3)#2-Cu(2)-C(3) 180.000(2)

N(3)#2-Cu(2)-Cu(3)#2 92.8(3)

C(3)#2-Cu(2)-Cu(3)#2 92.8(3)

C(3)-Cu(2)-Cu(3)#2 87.2(3)

N(3)#2-Cu(2)-Cu(3) 87.2(3)

C(3)#2-Cu(2)-Cu(3) 87.2(3)

C(3)-Cu(2)-Cu(3) 92.8(3)

Cu(3)#2-Cu(2)-Cu(3) 180.0

C(5)-Cu(3)-C(4) 144.4(3)

C(5)-Cu(3)-N(9)#3 106.7(3)

C(4)-Cu(3)-N(9)#3 108.0(3)

C(5)-Cu(3)-Cu(2) 85.3(2)

C(4)-Cu(3)-Cu(2) 92.3(3)

N(9)#3-Cu(3)-Cu(2) 106.8(2)

C(6)-Cu(4)-C(7) 144.7(3)

C(6)-Cu(4)-N(8) 108.8(3)

C(7)-Cu(4)-N(8) 106.5(3)

C(6)-Cu(4)-Cu(1)#4 75.4(2)

C(7)-Cu(4)-Cu(1)#4 77.2(2)

N(8)-Cu(4)-Cu(1)#4 145.0(2)

C(8)-N(8)-C(12) 115.9(7)

C(8)-N(8)-Cu(4) 122.6(5)

C(12)-N(8)-Cu(4) 121.4(5)

C(15)-N(9)-C(17) 116.3(7)

C(15)-N(9)-Cu(3)#5 122.6(6)

C(17)-N(9)-Cu(3)#5 121.1(5)

N(1)#6-C(1)-C(1)#6 0.0(14)

N(1)#6-C(1)-Cu(1) 177.5(12)

C(1)#6-C(1)-Cu(1) 177.5(12)

C(3)-C(2)-Cu(1) 172.3(9)

C(2)-C(3)-Cu(2) 175.6(9)

N(4)#7-C(4)-C(4)#7 0.0(8)

N(4)#7-C(4)-Cu(3) 175.7(10)

C(4)#7-C(4)-Cu(3) 175.7(10)

C(6)-C(5)-Cu(3) 176.5(7)

C(5)-C(6)-Cu(4) 175.3(7)

N(7)#8-C(7)-C(7)#8 0.0(8)

N(7)#8-C(7)-Cu(4) 176.4(10)

C(7)#8-C(7)-Cu(4) 176.4(10)

N(8)-C(8)-C(9) 124.0(7)

C(8)-C(9)-C(10) 120.1(8)

C(11)-C(10)-C(9) 115.6(7)

C(11)-C(10)-C(13) 122.6(7)

C(9)-C(10)-C(13) 121.8(7)

C(12)-C(11)-C(10) 120.4(7)

N(8)-C(12)-C(11) 123.9(7)

C(14)-C(13)-C(16) 115.9(8)

C(14)-C(13)-C(10) 122.8(7)

C(16)-C(13)-C(10) 121.2(7)

C(13)-C(14)-C(15) 120.4(8)

N(9)-C(15)-C(14) 123.5(8)

C(17)-C(16)-C(13) 120.8(8)

N(9)-C(17)-C(16) 123.1(7)

_____________________________________________________________

Symmetry transformations used to generate equivalent atoms:

#1 x,y+1,z #2 -x,-y+2,-z+2 #3 x,y-1,z+1 #4 x,y-1,z

#5 x,y+1,z-1 #6 -x+1,-y+3,-z+1 #7 -x+1,-y+2,-z+2

#8 -x,-y+1,-z+1

Table 4. Anisotropic displacement parameters (Å2x 103) for [Cu7(CN)7(4,4'-bpy)2]. The anisotropic displacement factor exponent takes the form: -2p2[ h2 a*2U11 + ... + 2 h k a* b* U12 ]

______________________________________________________________________________

U11 U22 U33 U23 U13 U12

______________________________________________________________________________

Cu(1) 62(1) 40(1) 54(1) -6(1) -31(1) -2(1)

Cu(2) 56(1) 46(1) 40(1) -10(1) -22(1) -16(1)

Cu(3) 43(1) 17(1) 25(1) 1(1) -18(1) -8(1)

Cu(4) 32(1) 17(1) 18(1) 2(1) -10(1) -8(1)

N(8) 29(4) 20(4) 15(3) -1(3) -8(3) -8(3)

N(9) 48(5) 16(4) 25(4) 6(3) -18(4) -7(3)

C(1) 44(6) 38(5) 55(7) -32(5) -38(5) 13(5)

N(1) 44(6) 38(5) 55(7) -32(5) -38(5) 13(5)

C(2) 59(6) 30(5) 53(6) -19(5) -35(5) 5(5)

N(2) 59(6) 30(5) 53(6) -19(5) -35(5) 5(5)

C(3) 55(6) 40(6) 44(6) -20(5) -25(5) -7(5)

N(3) 55(6) 40(6) 44(6) -20(5) -25(5) -7(5)

C(4) 45(5) 18(4) 21(4) 1(3) -16(3) -4(3)

N(4) 45(5) 18(4) 21(4) 1(3) -16(3) -4(3)

C(5) 28(4) 15(4) 21(4) -2(3) -9(3) -7(3)

N(5) 28(4) 15(4) 21(4) -2(3) -9(3) -7(3)

C(6) 28(4) 24(4) 24(4) 0(3) -1(3) -8(3)

N(6) 28(4) 24(4) 24(4) 0(3) -1(3) -8(3)

C(7) 27(4) 23(4) 19(4) -4(3) -7(3) -3(3)

N(7) 27(4) 23(4) 19(4) -4(3) -7(3) -3(3)

C(8) 42(5) 24(5) 23(4) 3(4) -21(4) -12(4)

C(9) 44(5) 20(5) 25(5) 0(4) -19(4) -16(4)

C(10) 31(5) 11(4) 17(4) 0(3) -10(3) 0(3)

C(11) 51(6) 23(5) 15(4) 7(3) -18(4) -12(4)

C(12) 37(5) 12(4) 19(4) 3(3) -8(4) -13(3)

C(13) 27(4) 22(4) 14(4) -9(3) -4(3) -6(3)

C(14) 42(5) 20(4) 20(4) 3(3) -17(4) -14(4)

C(15) 55(6) 24(5) 23(5) 3(4) -19(4) -21(4)

C(16) 44(5) 20(4) 19(4) 2(3) -12(4) -16(4)

C(17) 48(6) 29(5) 17(4) 5(4) -18(4) -18(4)

______________________________________________________________________________

Table 5. Hydrogen coordinates ( x 104) and isotropic displacement parameters (Å2x 10 3)

for [Cu7(CN)7(4,4'-bpy)2].

______________________________________________________________________________

x y z U(eq)

______________________________________________________________________________

H(8) 3020 10152 5544 33

H(9) 3489 12437 4245 33

H(11) 1471 10292 2078 34

H(12) 1097 8055 3438 26

H(14) 3870 14531 3004 31

H(15) 4168 16798 1659 38

H(16) 1705 12410 912 32

H(17) 1959 14748 -345 35

______________________________________________________________________________
