# Supplementary material for: Solid state coordination chemistry of the copper(I)–cyano–organodiimine system. Two- and three-dimensional copper cyanide phases incorporating linear dipodal ligands
Source: Royal Society of Chemistry journal article supplement (doi:10.1039/b100390i), 2001-01-01
Supplement: b100390i-7.doc [file b100390i-7.doc]

Table 1. Crystal data and structure refinement for [Cu3(CN)3(pyr)2].

Identification code [Cu3(CN)3(pyr)2]

Empirical formula C11H8Cu3N7

Formula weight 428.86

Temperature 115(2) K

Wavelength 0.71073 Å

Crystal system Monoclinic

Space group C2/m

Unit cell dimensions *a* = 12.536(3) Å = 90.

*b* = 10.2034(19) Å = 93.544(4).

*c* = 5.5845(11) Å  = 90.

Volume 713.0(2) Å3

Z 2

Density (calculated) 1.998 Mg/m3

Absorption coefficient 4.435 mm-1

F(000) 420

Crystal size 0.17 x 0.11 x 0.09 mm3

Theta range for data collection 2.58 to 28.27.

Index ranges -14<=h<=16, -13<=k<=8, -7<=l<=7

Reflections collected 2370

Independent reflections 913 [R(int) = 0.0557]

Completeness to theta = 28.27 97.2 %

Absorption correction SADABS

Refinement method Full-matrix least-squares on F2

Data / restraints / parameters 913 / 0 / 57

Goodness-of-fit on F2 1.072

Final R indices [I>2sigma(I)] R1 = 0.0564, wR2 = 0.1406

R indices (all data) R1 = 0.0680, wR2 = 0.1568

Extinction coefficient 0.0004(19)

Largest diff. peak and hole 2.301 and -1.322 e.Å-3

Table 2. Atomic coordinates ( x 104) and equivalent isotropic displacement parameters (Å2x 103) for [Cu3(CN)3(pyr)2]. U(eq) is defined as one third of the trace of the orthogonalized Uij tensor.

______________________________________________________________________________

x y z U(eq)

______________________________________________________________________________

Cu(1) 3078(1) 0 5962(1) 22(1)

Cu(2) 0 0 0 22(1)

N(4) 2767(3) 1545(3) 8319(6) 16(1)

N(1) 4556(5) 0 5252(10) 21(1)

N(2) 1820(5) 0 3702(11) 21(1)

N(3) 1104(5) 0 2343(11) 23(1)

C(1) 4556(5) 0 5252(10) 21(1)

C(2) 1820(5) 0 3702(11) 21(1)

C(3) 1104(5) 0 2343(11) 23(1)

C(4) 1870(3) 2269(4) 8032(7) 17(1)

C(5) 3391(3) 1812(4) 10297(7) 19(1)

______________________________________________________________________________

Table 3. Bond lengths [Å] and angles [] for [Cu3(CN)3(pyr)2].

_____________________________________________________

Cu(1)-N(1) 1.919(6)

Cu(1)-N(2) 1.957(7)

Cu(1)-N(4) 2.105(3)

Cu(1)-N(4)#1 2.105(3)

Cu(2)-N(3) 1.845(7)

Cu(2)-C(3)#2 1.845(7)

Cu(2)-N(3)#2 1.845(7)

N(4)-C(5) 1.341(5)

N(4)-C(4) 1.347(5)

N(1)-C(1)#3 1.165(12)

N(1)-N(1)#3 1.165(12)

N(2)-N(3) 1.139(10)

C(4)-C(5)#4 1.377(6)

C(5)-C(4)#4 1.377(6)

N(1)-Cu(1)-N(2) 128.0(2)

N(1)-Cu(1)-N(4) 110.34(14)

N(2)-Cu(1)-N(4) 103.32(15)

N(1)-Cu(1)-N(4)#1 110.34(14)

N(2)-Cu(1)-N(4)#1 103.32(15)

N(4)-Cu(1)-N(4)#1 96.95(17)

N(3)-Cu(2)-C(3)#2 180.0(4)

N(3)-Cu(2)-N(3)#2 180.0(4)

C(3)#2-Cu(2)-N(3)#2 0.0(4)

C(5)-N(4)-C(4) 115.3(4)

C(5)-N(4)-Cu(1) 123.1(3)

C(4)-N(4)-Cu(1) 121.5(3)

C(1)#3-N(1)-N(1)#3 0.0(5)

C(1)#3-N(1)-Cu(1) 177.9(7)

N(1)#3-N(1)-Cu(1) 177.9(7)

N(3)-N(2)-Cu(1) 178.4(6)

N(2)-N(3)-Cu(2) 176.6(6)

N(4)-C(4)-C(5)#4 121.6(4)

N(4)-C(5)-C(4)#4 123.1(4)

_____________________________________________________________

Symmetry transformations used to generate equivalent atoms:

#1 x,-y,z #2 -x,-y,-z #3 -x+1,-y,-z+1 #4 -x+1/2,-y+1/2,-z+2

Table 4. Anisotropic displacement parameters (Å2x 103) for [Cu3(CN)3(pyr)2]. The anisotropic displacement factor exponent takes the form: -2p2[ h2 a*2U11 + ... + 2 h k a* b* U12 ]

______________________________________________________________________________

U11 U22 U33 U23 U13 U12

______________________________________________________________________________

Cu(1) 33(1) 17(1) 16(1) 0 5(1) 0

Cu(2) 20(1) 22(1) 22(1) 0 -2(1) 0

N(4) 21(2) 14(2) 14(2) 2(1) 1(1) 0(1)

N(1) 27(3) 15(2) 18(2) 0 -7(2) 0

N(2) 18(3) 24(3) 23(3) 0 3(2) 0

N(3) 27(3) 22(3) 20(3) 0 4(2) 0

C(1) 27(3) 15(2) 18(2) 0 -7(2) 0

C(2) 18(3) 24(3) 23(3) 0 3(2) 0

C(3) 27(3) 22(3) 20(3) 0 4(2) 0

C(4) 17(2) 19(2) 14(2) 3(1) 0(1) 0(2)

C(5) 18(2) 19(2) 19(2) 5(2) 0(2) 1(2)

______________________________________________________________________________

Table 5. Hydrogen coordinates ( x 104) and isotropic displacement parameters (Å2x 10 3)

for [Cu3(CN)3(pyr)2].

______________________________________________________________________________

x y z U(eq)

______________________________________________________________________________

H(4) 1415 2145 6672 20

H(5) 4029 1354 10551 22

______________________________________________________________________________
