# Supplementary material for: Solid state coordination chemistry of the copper(I)–cyano–organodiimine system. Two- and three-dimensional copper cyanide phases incorporating linear dipodal ligands
Source: Royal Society of Chemistry journal article supplement (doi:10.1039/b100390i), 2001-01-01
Supplement: b100390i-8.doc [file b100390i-8.doc]

Table 1. Crystal data and structure refinement for [Cu2(CN)2(mpyr)].

Identification code [Cu2(CN)2(mpyr)]

Empirical formula C7H8Cu2N4

Formula weight 275.25

Temperature 115(2) K

Wavelength 0.71073 Å

Crystal system Monoclinic

Space group C2/c

Unit cell dimensions *a* = 14.1228(14) Å = 90.

*b* = 8.7264(9) Å = 98.125(2).

*c* = 7.2508(7) Å  = 90.

Volume 884.63(15) Å3

Z 4

Density (calculated) 2.067 Mg/m3

Absorption coefficient 4.759 mm-1

F(000) 544

Crystal size 0.25 x 0.19 x 0.05 mm3

Theta range for data collection 2.75 to 28.28.

Index ranges -16<=h<=18, -10<=k<=11, -9<=l<=9

Reflections collected 2867

Independent reflections 1063 [R(int) = 0.0351]

Completeness to theta = 28.28 96.7 %

Refinement method Full-matrix least-squares on F2

Data / restraints / parameters 1063 / 0 / 64

Goodness-of-fit on F2 1.067

Final R indices [I>2sigma(I)] R1 = 0.0356, wR2 = 0.0898

R indices (all data) R1 = 0.0505, wR2 = 0.0940

Largest diff. peak and hole 0.707 and -0.592 e.Å-3

Table 2. Atomic coordinates ( x 104) and equivalent isotropic displacement parameters (Å2x 103) for [Cu2(CN)2(mpyr)]. U(eq) is defined as one third of the trace of the orthogonalized Uij tensor.

______________________________________________________________________________

x y z U(eq)

______________________________________________________________________________

Cu(1) 2882(1) 1505(1) 1182(1) 13(1)

N(3) 4164(2) 651(4) 489(4) 15(1)

N(1) 2332(2) -349(4) 2095(4) 12(1)

N(2) 2227(3) -1471(4) 2854(5) 21(1)

C(1) 2332(2) -349(4) 2095(4) 12(1)

C(2) 2227(3) -1471(4) 2854(5) 21(1)

C(3) 4889(3) 1530(4) 66(5) 17(1)

C(4) 5714(3) 876(5) -419(5) 16(1)

C(5) 4815(6) 3241(8) 4(11) 18(2)

______________________________________________________________________________

Table 3. Bond lengths [Å] and angles [] for [Cu2(CN)2(mpyr)].

_____________________________________________________

Cu(1)-C(2)#1 1.914(4)

Cu(1)-N(2)#1 1.914(4)

Cu(1)-N(1) 1.950(3)

Cu(1)-N(3) 2.083(3)

Cu(1)-C(2)#2 2.459(4)

Cu(1)-N(2)#2 2.459(4)

Cu(1)-Cu(1)#3 2.5682(8)

N(3)-C(4)#4 1.345(5)

N(3)-C(3) 1.349(5)

N(1)-N(2) 1.143(5)

N(2)-Cu(1)#5 1.914(4)

N(2)-Cu(1)#6 2.459(4)

C(3)-C(4) 1.387(5)

C(3)-C(5) 1.496(7)

C(4)-N(3)#4 1.345(5)

C(2)#1-Cu(1)-N(2)#1 0.0(3)

C(2)#1-Cu(1)-N(1) 125.80(14)

N(2)#1-Cu(1)-N(1) 125.80(14)

C(2)#1-Cu(1)-N(3) 122.39(14)

N(2)#1-Cu(1)-N(3) 122.39(14)

N(1)-Cu(1)-N(3) 100.75(13)

C(2)#1-Cu(1)-C(2)#2 109.31(12)

N(2)#1-Cu(1)-C(2)#2 109.31(12)

N(1)-Cu(1)-C(2)#2 102.17(12)

N(3)-Cu(1)-C(2)#2 88.76(11)

C(2)#1-Cu(1)-N(2)#2 109.31(12)

N(2)#1-Cu(1)-N(2)#2 109.31(12)

N(1)-Cu(1)-N(2)#2 102.17(12)

N(3)-Cu(1)-N(2)#2 88.76(11)

C(2)#2-Cu(1)-N(2)#2 0.00(19)

C(2)#1-Cu(1)-Cu(1)#3 64.62(11)

N(2)#1-Cu(1)-Cu(1)#3 64.62(11)

N(1)-Cu(1)-Cu(1)#3 129.62(9)

N(3)-Cu(1)-Cu(1)#3 112.24(8)

C(2)#2-Cu(1)-Cu(1)#3 44.69(9)

N(2)#2-Cu(1)-Cu(1)#3 44.69(9)

C(4)#4-N(3)-C(3) 116.7(3)

C(4)#4-N(3)-Cu(1) 119.0(3)

C(3)-N(3)-Cu(1) 124.4(3)

N(2)-N(1)-Cu(1) 163.5(3)

N(1)-N(2)-Cu(1)#5 171.5(3)

N(1)-N(2)-Cu(1)#6 115.2(3)

Cu(1)#5-N(2)-Cu(1)#6 70.69(12)

N(3)-C(3)-C(4) 121.0(4)

N(3)-C(3)-C(5) 121.5(4)

C(4)-C(3)-C(5) 117.4(4)

N(3)#4-C(4)-C(3) 122.3(4)

_____________________________________________________________

Symmetry transformations used to generate equivalent atoms:

#1 -x+1/2,y+1/2,-z+1/2 #2 x,-y,z-1/2 #3 -x+1/2,-y+1/2,-z

#4 -x+1,-y,-z #5 -x+1/2,y-1/2,-z+1/2 #6 x,-y,z+1/2

Table 4. Anisotropic displacement parameters (Å2x 103) for [Cu2(CN)2(mpyr.)]. Anisotropic displacement factor exponent takes the form: -2p2[ h2 a*2U11 + ... + 2 h k a* b* U12 ]

______________________________________________________________________________

U11 U22 U33 U23 U13 U12

______________________________________________________________________________

Cu(1) 17(1) 10(1) 13(1) 1(1) 3(1) 2(1)

N(3) 18(2) 15(2) 9(1) -2(1) -3(1) 4(1)

N(1) 15(2) 9(2) 10(2) 3(1) -1(1) -3(1)

N(2) 16(2) 26(2) 20(2) -7(2) 1(1) 0(2)

C(1) 15(2) 9(2) 10(2) 3(1) -1(1) -3(1)

C(2) 16(2) 26(2) 20(2) -7(2) 1(1) 0(2)

C(3) 17(2) 18(2) 14(2) -3(1) -1(1) 3(2)

C(4) 16(2) 19(2) 13(2) -1(1) -1(1) 2(2)

C(5) 14(4) 21(4) 20(4) -2(3) 6(3) -4(3)

______________________________________________________________________________

Table 5 Hydrogen coordinates ( x 104) and isotropic displacement parameters (Å2x 10 3)

for [Cu2(CN)2(mpyr)].

________________________________________________________________________

x y z U(eq)

________________________________________________________________________

H(4A) 6199 1515 -706 19

H(5A) 4348 3542 -1024 27

H(5B) 5425 3670 -148 27

H(5C) 4625 3607 1145 27

________________________________________________________________________
