# Supplementary material for: Solid state coordination chemistry of the copper(I)–cyano–organodiimine system. Two- and three-dimensional copper cyanide phases incorporating linear dipodal ligands
Source: Royal Society of Chemistry journal article supplement (doi:10.1039/b100390i), 2001-01-01
Supplement: b100390i-9.doc [file b100390i-9.doc]

Table 1. Crystal data and structure refinement for [Cu2(CN)2(2,3-dmp)].

Identification code [Cu2(CN)2(2,3-dmp)]

Empirical formula C24H24Cu6N12

Formula weight 861.79

Temperature 115(2) K

Wavelength 0.71073 Å

Crystal system Triclinic

Space group P-1

Unit cell dimensions *a* = 9.5676(8) Å = 80.392(2).

*b* = 12.8333(11) Å = 85.036(2).

*c* = 12.9090(11) Å  = 71.907(2).

Volume 1484.5(2) Å3

Z 2

Density (calculated) 1.928 Mg/m3

Absorption coefficient 4.258 mm-1

F(000) 852

Crystal size 0.27 x 0.13 x 0.11 mm3

Theta range for data collection 1.60 to 28.30.

Index ranges -11<=h<=12, -16<=k<=17, -16<=l<=14

Reflections collected 9756

Independent reflections 6704 [R(int) = 0.0269]

Completeness to theta = 28.30 90.8 %

Refinement method Full-matrix least-squares on F2

Data / restraints / parameters 6704 / 0 / 379

Goodness-of-fit on F2 1.051

Final R indices [I>2sigma(I)] R1 = 0.0660, wR2 = 0.1724

R indices (all data) R1 = 0.0889, wR2 = 0.1843

Largest diff. peak and hole 5.657 and -1.168 e.Å-3

Table 2. Atomic coordinates ( x 104) and equivalent isotropic displacement parameters (Å2x 103) for [Cu2(CN)2(2,3-dmp)]. U(eq) is defined as one third of the trace of the orthogonalized Uij tensor.

______________________________________________________________________________

x y z U(eq)

______________________________________________________________________________

Cu(1) -4217(1) 5923(1) 5027(1) 22(1)

Cu(2) -1630(1) 2422(1) 3641(1) 19(1)

Cu(3) 3287(1) -275(1) 3225(1) 18(1)

Cu(4) 1238(1) 106(1) 1731(1) 18(1)

Cu(5) -1554(1) 3834(1) -47(1) 17(1)

Cu(6) -3820(1) 7431(1) 1268(1) 17(1)

N(13) 7012(6) 1587(5) 3217(5) 16(1)

N(14) 4996(6) 455(4) 3018(4) 16(1)

N(15) -2451(6) -1753(5) 1673(5) 17(1)

N(16) -473(6) -626(5) 1927(4) 16(1)

N(17) -2182(6) 4373(5) -1570(5) 19(1)

N(18) -3481(6) 5391(5) -3473(5) 18(1)

N(1) -3175(7) 4629(5) 4379(5) 18(1)

N(2) -2521(7) 3817(5) 4040(6) 24(1)

N(3) 243(7) 1322(5) 3627(5) 17(1)

N(4) 1375(8) 696(6) 3448(5) 26(2)

N(5) 4268(7) -1740(5) 3955(5) 16(1)

N(6) 4857(7) -2613(5) 4391(5) 21(1)

N(7) 4280(7) -1474(5) 1304(5) 16(1)

N(8) 3155(8) -862(5) 1507(5) 23(1)

N(9) 257(6) 1566(5) 979(5) 15(1)

N(10) -382(8) 2431(6) 552(5) 26(2)

N(11) -2613(7) 5166(5) 546(5) 18(1)

N(12) -3118(7) 6022(6) 844(6) 26(2)

C(1) -3175(7) 4629(5) 4379(5) 18(1)

C(2) -2521(7) 3817(5) 4040(6) 24(1)

C(3) 243(7) 1322(5) 3627(5) 17(1)

C(4) 1375(8) 696(6) 3448(5) 26(2)

C(5) 4268(7) -1740(5) 3955(5) 16(1)

C(6) 4857(7) -2613(5) 4391(5) 21(1)

C(7) 4280(7) -1474(5) 1304(5) 16(1)

C(8) 3155(8) -862(5) 1507(5) 23(1)

C(9) 257(6) 1566(5) 979(5) 15(1)

C(10) -382(8) 2431(6) 552(5) 26(2)

C(11) -2613(7) 5166(5) 546(5) 18(1)

C(12) -3118(7) 6022(6) 844(6) 26(2)

C(13) 6010(7) 1967(5) 2469(5) 16(1)

C(14) 4991(7) 1397(5) 2352(5) 16(1)

C(15) 6038(8) 72(5) 3743(6) 19(1)

C(16) 7023(8) 632(5) 3839(6) 20(1)

C(17) 6007(8) 3013(6) 1729(6) 23(2)

C(18) 3932(8) 1782(6) 1489(6) 23(2)

C(19) -1449(7) -2147(5) 2430(5) 16(1)

C(20) -460(7) -1562(6) 2569(6) 18(1)

C(21) -1483(8) -235(6) 1192(6) 20(1)

C(22) -2477(7) -785(5) 1066(6) 18(1)

C(23) -1464(8) -3208(6) 3118(6) 22(2)

C(24) 605(8) -1972(6) 3443(6) 25(2)

C(25) -3248(8) 4059(6) -1912(6) 22(2)

C(26) -3883(8) 4552(6) -2865(6) 21(1)

C(27) -1762(7) 5204(6) -2167(6) 19(1)

C(28) -575(8) 5547(7) -1772(6) 26(2)

C(29) -2436(7) 5721(5) -3130(6) 18(1)

C(30) -1994(10) 6653(7) -3783(6) 31(2)

______________________________________________________________________________

Table 3. Bond lengths [Å] and angles [] for [Cu2(CN)2(2,3-dmp)].

_____________________________________________________

Cu(1)-C(6)#1 1.888(7)

Cu(1)-N(6)#1 1.888(7)

Cu(1)-N(1) 1.934(6)

Cu(1)-N(18)#2 2.052(6)

Cu(2)-N(2) 1.866(7)

Cu(2)-N(3) 1.907(6)

Cu(2)-N(13)#3 2.077(6)

Cu(3)-N(4) 1.896(7)

Cu(3)-N(5) 1.941(6)

Cu(3)-N(14) 2.101(6)

Cu(3)-Cu(4) 2.7467(12)

Cu(4)-N(8) 1.898(7)

Cu(4)-N(9) 1.947(6)

Cu(4)-N(16) 2.105(6)

Cu(5)-N(10) 1.878(7)

Cu(5)-N(11) 1.939(6)

Cu(5)-N(17) 2.048(6)

Cu(6)-N(12) 1.880(7)

Cu(6)-C(7)#1 1.924(6)

Cu(6)-N(7)#1 1.924(6)

Cu(6)-N(15)#4 2.058(6)

N(13)-C(13) 1.342(9)

N(13)-C(16) 1.346(9)

N(13)-Cu(2)#5 2.077(6)

N(14)-C(15) 1.347(9)

N(14)-C(14) 1.360(8)

N(15)-C(22) 1.348(8)

N(15)-C(19) 1.352(9)

N(15)-Cu(6)#6 2.058(6)

N(16)-C(21) 1.335(9)

N(16)-C(20) 1.338(9)

N(17)-C(25) 1.337(9)

N(17)-C(27) 1.354(9)

N(18)-C(29) 1.332(9)

N(18)-C(26) 1.359(9)

N(18)-Cu(1)#7 2.052(6)

N(1)-N(2) 1.171(9)

N(3)-N(4) 1.162(9)

N(5)-N(6) 1.158(9)

N(6)-Cu(1)#8 1.888(7)

N(7)-N(8) 1.157(9)

N(7)-Cu(6)#8 1.924(6)

N(9)-N(10) 1.159(9)

N(11)-N(12) 1.169(9)

C(13)-C(14) 1.419(9)

C(13)-C(17) 1.513(9)

C(14)-C(18) 1.488(10)

C(15)-C(16) 1.376(10)

C(19)-C(20) 1.417(10)

C(19)-C(23) 1.500(9)

C(20)-C(24) 1.503(10)

C(21)-C(22) 1.382(10)

C(25)-C(26) 1.384(10)

C(27)-C(29) 1.414(10)

C(27)-C(28) 1.493(10)

C(29)-C(30) 1.495(10)

C(6)#1-Cu(1)-N(6)#1 0.0(6)

C(6)#1-Cu(1)-N(1) 129.4(3)

N(6)#1-Cu(1)-N(1) 129.4(3)

C(6)#1-Cu(1)-N(18)#2 128.2(3)

N(6)#1-Cu(1)-N(18)#2 128.2(3)

N(1)-Cu(1)-N(18)#2 99.9(2)

N(2)-Cu(2)-N(3) 140.3(3)

N(2)-Cu(2)-N(13)#3 117.7(3)

N(3)-Cu(2)-N(13)#3 101.4(2)

N(4)-Cu(3)-N(5) 130.3(3)

N(4)-Cu(3)-N(14) 115.7(3)

N(5)-Cu(3)-N(14) 101.6(2)

N(4)-Cu(3)-Cu(4) 61.5(2)

N(5)-Cu(3)-Cu(4) 123.21(18)

N(14)-Cu(3)-Cu(4) 122.54(16)

N(8)-Cu(4)-N(9) 129.7(3)

N(8)-Cu(4)-N(16) 115.8(3)

N(9)-Cu(4)-N(16) 101.2(2)

N(8)-Cu(4)-Cu(3) 61.5(2)

N(9)-Cu(4)-Cu(3) 123.91(18)

N(16)-Cu(4)-Cu(3) 122.91(15)

N(10)-Cu(5)-N(11) 132.5(3)

N(10)-Cu(5)-N(17) 128.9(3)

N(11)-Cu(5)-N(17) 98.6(2)

N(12)-Cu(6)-C(7)#1 134.3(3)

N(12)-Cu(6)-N(7)#1 134.3(3)

C(7)#1-Cu(6)-N(7)#1 0.0(3)

N(12)-Cu(6)-N(15)#4 122.9(3)

C(7)#1-Cu(6)-N(15)#4 102.4(2)

N(7)#1-Cu(6)-N(15)#4 102.4(2)

C(13)-N(13)-C(16) 117.0(6)

C(13)-N(13)-Cu(2)#5 126.4(4)

C(16)-N(13)-Cu(2)#5 116.1(5)

C(15)-N(14)-C(14) 117.4(6)

C(15)-N(14)-Cu(3) 115.9(5)

C(14)-N(14)-Cu(3) 125.4(5)

C(22)-N(15)-C(19) 117.5(6)

C(22)-N(15)-Cu(6)#6 116.5(5)

C(19)-N(15)-Cu(6)#6 125.7(5)

C(21)-N(16)-C(20) 118.3(6)

C(21)-N(16)-Cu(4) 114.9(5)

C(20)-N(16)-Cu(4) 125.3(5)

C(25)-N(17)-C(27) 118.4(6)

C(25)-N(17)-Cu(5) 119.2(5)

C(27)-N(17)-Cu(5) 121.1(5)

C(29)-N(18)-C(26) 118.0(6)

C(29)-N(18)-Cu(1)#7 121.6(5)

C(26)-N(18)-Cu(1)#7 119.5(5)

N(2)-N(1)-Cu(1) 176.4(6)

N(1)-N(2)-Cu(2) 171.9(6)

N(4)-N(3)-Cu(2) 169.2(6)

N(3)-N(4)-Cu(3) 175.6(7)

N(6)-N(5)-Cu(3) 179.8(7)

N(5)-N(6)-Cu(1)#8 176.1(6)

N(8)-N(7)-Cu(6)#8 168.4(6)

N(7)-N(8)-Cu(4) 174.6(6)

N(10)-N(9)-Cu(4) 177.1(6)

N(9)-N(10)-Cu(5) 174.9(7)

N(12)-N(11)-Cu(5) 171.7(6)

N(11)-N(12)-Cu(6) 175.8(6)

N(13)-C(13)-C(14) 121.5(6)

N(13)-C(13)-C(17) 118.4(6)

C(14)-C(13)-C(17) 120.1(6)

N(14)-C(14)-C(13) 120.1(6)

N(14)-C(14)-C(18) 118.3(6)

C(13)-C(14)-C(18) 121.6(6)

N(14)-C(15)-C(16) 121.5(6)

N(13)-C(16)-C(15) 122.4(6)

N(15)-C(19)-C(20) 120.8(6)

N(15)-C(19)-C(23) 116.8(6)

C(20)-C(19)-C(23) 122.4(6)

N(16)-C(20)-C(19) 120.3(6)

N(16)-C(20)-C(24) 119.0(6)

C(19)-C(20)-C(24) 120.7(6)

N(16)-C(21)-C(22) 121.8(6)

N(15)-C(22)-C(21) 121.2(6)

N(17)-C(25)-C(26) 120.9(7)

N(18)-C(26)-C(25) 121.5(6)

N(17)-C(27)-C(29) 120.4(6)

N(17)-C(27)-C(28) 117.7(6)

C(29)-C(27)-C(28) 121.9(6)

N(18)-C(29)-C(27) 120.8(6)

N(18)-C(29)-C(30) 118.6(6)

C(27)-C(29)-C(30) 120.6(6)

_____________________________________________________________

Symmetry transformations used to generate equivalent atoms:

#1 x-1,y+1,z #2 x,y,z+1 #3 x-1,y,z #4 x,y+1,z

#5 x+1,y,z #6 x,y-1,z #7 x,y,z-1 #8 x+1,y-1,z

Table 4. Anisotropic displacement parameters (Å2x 103) for [Cu2(CN)2(2,3-dmp)]. The anisotropic displacement factor exponent takes the form: -2p2[ h2 a*2U11 + ... + 2 h k a* b* U12 ]

______________________________________________________________________________

U11 U22 U33 U23 U13 U12

______________________________________________________________________________

Cu(1) 26(1) 16(1) 19(1) 0(1) -8(1) 1(1)

Cu(2) 18(1) 12(1) 24(1) -3(1) -1(1) -1(1)

Cu(3) 17(1) 10(1) 24(1) 1(1) -2(1) -1(1)

Cu(4) 14(1) 12(1) 23(1) 1(1) -4(1) 1(1)

Cu(5) 16(1) 14(1) 21(1) 1(1) -7(1) -3(1)

Cu(6) 16(1) 11(1) 21(1) -2(1) -2(1) 0(1)

N(13) 15(3) 13(3) 20(3) -4(2) -5(2) -2(2)

N(14) 19(3) 11(3) 14(3) 0(2) -2(2) 2(2)

N(15) 12(3) 16(3) 18(3) -1(2) 2(2) 1(2)

N(16) 14(3) 15(3) 15(3) -1(2) -3(2) -1(2)

N(17) 20(3) 14(3) 21(3) -2(2) -3(2) -2(2)

N(18) 23(3) 12(3) 20(3) -3(2) -4(2) -5(2)

N(1) 19(3) 14(3) 19(3) -1(2) -7(2) -1(2)

N(2) 22(3) 20(3) 30(4) -1(3) -7(3) -9(3)

N(3) 14(3) 15(3) 23(3) -6(2) -5(2) -2(2)

N(4) 33(4) 21(3) 22(4) -1(3) -2(3) -8(3)

N(5) 19(3) 11(3) 17(3) 1(2) -3(2) -4(2)

N(6) 19(3) 22(3) 23(3) -7(3) -1(3) -7(3)

N(7) 16(3) 10(3) 18(3) -2(2) -6(2) 4(2)

N(8) 27(4) 16(3) 23(4) 2(3) -5(3) -5(3)

N(9) 15(3) 9(3) 19(3) 1(2) -5(2) 1(2)

N(10) 27(4) 26(4) 22(4) -5(3) -3(3) -3(3)

N(11) 18(3) 12(3) 21(3) -3(2) -3(2) 0(2)

N(12) 21(3) 25(4) 28(4) 3(3) -5(3) -6(3)

C(1) 19(3) 14(3) 19(3) -1(2) -7(2) -1(2)

C(2) 22(3) 20(3) 30(4) -1(3) -7(3) -9(3)

C(3) 14(3) 15(3) 23(3) -6(2) -5(2) -2(2)

C(4) 33(4) 21(3) 22(4) -1(3) -2(3) -8(3)

C(5) 19(3) 11(3) 17(3) 1(2) -3(2) -4(2)

C(6) 19(3) 22(3) 23(3) -7(3) -1(3) -7(3)

C(7) 16(3) 10(3) 18(3) -2(2) -6(2) 4(2)

C(8) 27(4) 16(3) 23(4) 2(3) -5(3) -5(3)

C(9) 15(3) 9(3) 19(3) 1(2) -5(2) 1(2)

C(10) 27(4) 26(4) 22(4) -5(3) -3(3) -3(3)

C(11) 18(3) 12(3) 21(3) -3(2) -3(2) 0(2)

C(12) 21(3) 25(4) 28(4) 3(3) -5(3) -6(3)

C(13) 18(3) 10(3) 17(3) 0(2) 1(2) -4(2)

C(14) 19(3) 11(3) 14(3) 0(2) 3(2) -3(2)

C(15) 20(3) 12(3) 20(4) 0(3) 0(3) 3(3)

C(16) 21(3) 12(3) 21(4) 2(3) -5(3) 0(3)

C(17) 26(4) 14(3) 23(4) 5(3) 4(3) -4(3)

C(18) 24(4) 20(3) 24(4) 3(3) -6(3) -6(3)

C(19) 19(3) 10(3) 11(3) 2(2) 3(2) 2(2)

C(20) 16(3) 18(3) 18(3) -2(3) -2(3) -2(3)

C(21) 18(3) 18(3) 22(4) -2(3) -3(3) -4(3)

C(22) 16(3) 12(3) 22(4) 0(3) -4(3) -1(2)

C(23) 19(3) 23(4) 23(4) 3(3) -3(3) -7(3)

C(24) 27(4) 20(3) 26(4) 5(3) -12(3) -5(3)

C(25) 26(4) 14(3) 26(4) 0(3) -9(3) -8(3)

C(26) 21(3) 17(3) 24(4) 0(3) -7(3) -6(3)

C(27) 18(3) 17(3) 24(4) -8(3) -4(3) -4(3)

C(28) 18(3) 29(4) 32(4) 0(3) -5(3) -11(3)

C(29) 15(3) 15(3) 23(4) 0(3) 1(3) -4(3)

C(30) 43(5) 35(4) 21(4) 2(3) -5(3) -22(4)

______________________________________________________________________________

Table 5. Hydrogen coordinates ( x 104) and isotropic displacement parameters (Å2x 10 3)

for [Cu2(CN)2(2,3-dmp)].

______________________________________________________________________________

x y z U(eq)

______________________________________________________________________________

H(15) 6093 -588 4189 23

H(16) 7722 341 4353 23

H(17A) 6759 3292 1916 35

H(17B) 5065 3561 1779 35

H(17C) 6195 2852 1021 35

H(18A) 3338 1294 1538 35

H(18B) 4464 1781 823 35

H(18C) 3312 2519 1547 35

H(21) -1519 425 753 24

H(22) -3176 -481 554 21

H(23A) -2210 -3471 2896 33

H(23B) -1672 -3079 3834 33

H(23C) -521 -3753 3063 33

H(24A) 1185 -1477 3420 37

H(24B) 1240 -2700 3362 37

H(24C) 72 -2002 4107 37

H(25) -3567 3502 -1503 26

H(26) -4600 4303 -3096 25

H(28A) -260 5101 -1111 39

H(28B) -945 6313 -1680 39

H(28C) 243 5447 -2271 39

H(30A) -2560 6904 -4405 46

H(30B) -967 6401 -3979 46

H(30C) -2172 7253 -3385 46

______________________________________________________________________________
