# Supplementary material for: Solid state coordination chemistry of the copper(I)–cyano–organodiimine system. Two- and three-dimensional copper cyanide phases incorporating linear dipodal ligands
Source: Royal Society of Chemistry journal article supplement (doi:10.1039/b100390i), 2001-01-01
Supplement: b100390i-11.doc [file b100390i-11.doc]

Table 1. Crystal data and structure refinement for [Cu2(CN)2(2,6-dmp)].

Identification code [Cu2(CN)2(2,6-dmp)]

Empirical formula C8H8Cu2N4

Formula weight 287.26

Temperature 115(2) K

Wavelength 0.71073 Å

Crystal system Monoclinic

Space group C2/c

Unit cell dimensions *a* = 16.553(4) Å = 90.

*b* = 7.773(2) Å = 116.051(5).

*c* = 18.025(5) Å  = 90.

Volume 2083.5(9) Å3

Z 8

Density (calculated) 1.832 Mg/m3

Absorption coefficient 4.045 mm-1

F(000) 1136

Crystal size 0.11 x 0.11 x 0.09 mm3

Theta range for data collection 2.52 to 28.28.

Index ranges -21<=h<=21, -8<=k<=10, -19<=l<=23

Reflections collected 6527

Independent reflections 2476 [R(int) = 0.0404]

Completeness to theta = 28.28 95.9 %

Absorption correction SADABS

Refinement method Full-matrix least-squares on F2

Data / restraints / parameters 2476 / 0 / 128

Goodness-of-fit on F2 1.063

Final R indices [I>2sigma(I)] R1 = 0.0455, wR2 = 0.1071

R indices (all data) R1 = 0.0655, wR2 = 0.1154

Extinction coefficient 0.00014(15)

Largest diff. peak and hole 0.981 and -0.826 e.Å-3

Table 2. Atomic coordinates ( x 104) and equivalent isotropic displacement parameters (Å2x 103) for [Cu2(CN)2(2,6-dmp)]. U(eq) is defined as one third of the trace of the orthogonalized Uij tensor.

______________________________________________________________________________

x y z U(eq)

______________________________________________________________________________

Cu(1) 1928(1) 10211(1) 4012(1) 17(1)

Cu(2) 156(1) 6621(1) 5015(1) 16(1)

N(5) 782(2) 7456(5) 6242(2) 18(1)

N(6) 1432(2) 8771(5) 7829(2) 16(1)

N(1) 3170(2) 10793(5) 4443(2) 13(1)

N(2) 1178(3) 8891(6) 4323(3) 26(1)

N(3) 739(2) 8027(5) 4513(2) 15(1)

N(4) -1067(3) 5979(6) 4662(3) 26(1)

C(1) 3170(2) 10793(5) 4443(2) 13(1)

C(2) 1178(3) 8891(6) 4323(3) 26(1)

C(3) 739(2) 8027(5) 4513(2) 15(1)

C(4) -1067(3) 5979(6) 4662(3) 26(1)

C(5) 890(3) 6458(6) 6885(3) 17(1)

C(6) 1017(3) 9105(6) 6402(3) 17(1)

C(7) 1338(3) 9787(6) 7193(3) 17(1)

C(8) 1225(3) 7102(6) 7684(3) 18(1)

C(9) 1554(4) 11650(6) 7360(3) 26(1)

C(10) 1381(4) 5986(6) 8420(3) 28(1)

______________________________________________________________________________

Table 3. Bond lengths [Å] and angles [] for [Cu2(CN)2(2,6-dmp)].

_____________________________________________________

Cu(1)-N(2) 1.877(5)

Cu(1)-N(1) 1.905(4)

Cu(1)-N(6)#1 2.075(4)

Cu(2)-N(4) 1.903(5)

Cu(2)-N(3) 1.927(4)

Cu(2)-N(5) 2.090(4)

Cu(2)-C(4)#2 2.434(5)

Cu(2)-N(4)#2 2.434(5)

Cu(2)-Cu(2)#2 2.5686(13)

N(5)-C(6) 1.334(6)

N(5)-C(5) 1.340(6)

N(6)-C(8) 1.338(6)

N(6)-C(7) 1.345(6)

N(6)-Cu(1)#3 2.075(4)

N(1)-C(4)#4 1.156(6)

N(1)-N(4)#4 1.156(6)

N(2)-N(3) 1.147(6)

N(4)-C(1)#5 1.156(6)

N(4)-N(1)#5 1.156(6)

N(4)-Cu(2)#2 2.434(5)

C(5)-C(8) 1.390(6)

C(6)-C(7) 1.389(6)

C(7)-C(9) 1.490(6)

C(8)-C(10) 1.509(6)

N(2)-Cu(1)-N(1) 138.14(17)

N(2)-Cu(1)-N(6)#1 120.00(16)

N(1)-Cu(1)-N(6)#1 101.44(15)

N(4)-Cu(2)-N(3) 132.09(18)

N(4)-Cu(2)-N(5) 113.33(16)

N(3)-Cu(2)-N(5) 101.72(15)

N(4)-Cu(2)-C(4)#2 108.55(16)

N(3)-Cu(2)-C(4)#2 101.40(16)

N(5)-Cu(2)-C(4)#2 92.14(15)

N(4)-Cu(2)-N(4)#2 108.55(16)

N(3)-Cu(2)-N(4)#2 101.40(16)

N(5)-Cu(2)-N(4)#2 92.14(15)

C(4)#2-Cu(2)-N(4)#2 0.0(3)

N(4)-Cu(2)-Cu(2)#2 63.94(14)

N(3)-Cu(2)-Cu(2)#2 133.14(12)

N(5)-Cu(2)-Cu(2)#2 109.20(11)

C(4)#2-Cu(2)-Cu(2)#2 44.61(12)

N(4)#2-Cu(2)-Cu(2)#2 44.61(12)

C(6)-N(5)-C(5) 116.9(4)

C(6)-N(5)-Cu(2) 119.3(3)

C(5)-N(5)-Cu(2) 123.5(3)

C(8)-N(6)-C(7) 118.6(4)

C(8)-N(6)-Cu(1)#3 121.5(3)

C(7)-N(6)-Cu(1)#3 119.8(3)

C(4)#4-N(1)-N(4)#4 0.0(4)

C(4)#4-N(1)-Cu(1) 172.2(4)

N(4)#4-N(1)-Cu(1) 172.2(4)

N(3)-N(2)-Cu(1) 177.2(4)

N(2)-N(3)-Cu(2) 170.6(4)

C(1)#5-N(4)-N(1)#5 0.0(5)

C(1)#5-N(4)-Cu(2) 172.0(4)

N(1)#5-N(4)-Cu(2) 172.0(4)

C(1)#5-N(4)-Cu(2)#2 116.6(4)

N(1)#5-N(4)-Cu(2)#2 116.6(4)

Cu(2)-N(4)-Cu(2)#2 71.45(16)

N(5)-C(5)-C(8) 122.0(4)

N(5)-C(6)-C(7) 122.2(4)

N(6)-C(7)-C(6) 120.0(4)

N(6)-C(7)-C(9) 118.1(4)

C(6)-C(7)-C(9) 121.9(4)

N(6)-C(8)-C(5) 120.2(4)

N(6)-C(8)-C(10) 117.1(4)

C(5)-C(8)-C(10) 122.7(4)

_____________________________________________________________

Symmetry transformations used to generate equivalent atoms:

#1 x,-y+2,z-1/2 #2 -x,-y+1,-z+1 #3 x,-y+2,z+1/2

#4 x+1/2,y+1/2,z #5 x-1/2,y-1/2,z

Table 4. Anisotropic displacement parameters (Å2x 103) for [Cu2(CN)2(2,6-dmp)]. The anisotropic displacement factor exponent takes the form: -2p2[ h2 a*2U11 + ... + 2 h k a* b* U12 ]

______________________________________________________________________________

U11 U22 U33 U23 U13 U12

______________________________________________________________________________

Cu(1) 17(1) 20(1) 14(1) 3(1) 9(1) -3(1)

Cu(2) 17(1) 20(1) 12(1) -1(1) 7(1) -6(1)

N(5) 20(2) 21(2) 11(2) -2(2) 7(2) -1(2)

N(6) 16(2) 17(2) 15(2) -3(1) 7(2) 2(1)

N(1) 12(2) 16(2) 11(2) 1(2) 4(2) -4(1)

N(2) 23(2) 30(3) 20(2) 2(2) 6(2) 2(2)

N(3) 16(2) 17(2) 13(2) 0(2) 8(2) -5(2)

N(4) 44(3) 23(2) 14(2) -2(2) 13(2) -2(2)

C(1) 12(2) 16(2) 11(2) 1(2) 4(2) -4(1)

C(2) 23(2) 30(3) 20(2) 2(2) 6(2) 2(2)

C(3) 16(2) 17(2) 13(2) 0(2) 8(2) -5(2)

C(4) 44(3) 23(2) 14(2) -2(2) 13(2) -2(2)

C(5) 24(2) 11(2) 15(2) -2(2) 10(2) -3(2)

C(6) 22(2) 14(2) 16(2) 3(2) 10(2) 1(2)

C(7) 17(2) 18(2) 14(2) -1(2) 5(2) 3(2)

C(8) 22(2) 22(2) 14(2) 0(2) 11(2) 2(2)

C(9) 38(3) 22(3) 17(2) -5(2) 11(2) -5(2)

C(10) 51(3) 19(3) 18(2) 3(2) 20(2) -1(2)

______________________________________________________________________________

Table 5. Hydrogen coordinates ( x 104) and isotropic displacement parameters (Å2x 10 3)

for [Cu2(CN)2(2,6-dmp)].

______________________________________________________________________________

x y z U(eq)

______________________________________________________________________________

H(5) 737 5300 6794 20

H(6) 964 9823 5970 20

H(9A) 1764 11871 7939 39

H(9B) 1024 12321 7052 39

H(9C) 2014 11959 7196 39

H(10A) 1614 6677 8911 42

H(10B) 1806 5099 8472 42

H(10C) 824 5471 8346 42

______________________________________________________________________________
