# Supplementary material for: Solid state coordination chemistry of the copper(I)–cyano–organodiimine system. Two- and three-dimensional copper cyanide phases incorporating linear dipodal ligands
Source: Royal Society of Chemistry journal article supplement (doi:10.1039/b100390i), 2001-01-01
Supplement: b100390i-12.doc [file b100390i-12.doc]

Table 1. Crystal data and structure refinement for [Cu2(CN)2(4,4'-bpy)].

Identification code [Cu2(CN)2(4,4'-bpy)]

Empirical formula C12H8Cu2N4

Formula weight 335.30

Temperature 115(2) K

Wavelength 0.71073 Å

Crystal system Monoclinic

Space group P2(1)/n

Unit cell dimensions *a* = 8.587(2) Å = 90.

*b* = 11.444(3) Å = 101.033(5).

*c* = 12.591(3) Å  = 90.

Volume 1214.5(5) Å3

Z 4

Density (calculated) 1.834 Mg/m3

Absorption coefficient 3.485 mm-1

F(000) 664

Crystal size 0.35 x 0.07 x 0.05 mm3

Theta range for data collection 2.43 to 28.28.

Index ranges -11<=h<=11, -14<=k<=14, -16<=l<=8

Reflections collected 7859

Independent reflections 2896 [R(int) = 0.0221]

Completeness to theta = 28.28 96.0 %

Absorption correction SADABS

Refinement method Full-matrix least-squares on F2

Data / restraints / parameters 2896 / 0 / 164

Goodness-of-fit on F2 1.049

Final R indices [I>2sigma(I)] R1 = 0.0259, wR2 = 0.0651

R indices (all data) R1 = 0.0309, wR2 = 0.0672

Extinction coefficient 0.0038(5)

Largest diff. peak and hole 0.688 and -0.529 e.Å-3

Table 2. Atomic coordinates ( x 104) and equivalent isotropic displacement parameters (Å2x 103) for [Cu2(CN)2(4,4'-bpy)]. U(eq) is defined as one third of the trace of the orthogonalized Uij tensor.

______________________________________________________________________________

x y z U(eq)

______________________________________________________________________________

Cu(1) 305(1) 9025(1) 5422(1) 11(1)

Cu(2) -3599(1) 6502(1) 6780(1) 12(1)

C(1) -1125(2) 7930(2) 5927(2) 10(1)

N(1) -1125(2) 7930(2) 5927(2) 10(1)

C(2) -2013(2) 7327(2) 6243(2) 17(1)

N(2) -2013(2) 7327(2) 6243(2) 17(1)

C(3) -4025(2) 5947(2) 8125(2) 9(1)

N(3) -4025(2) 5947(2) 8125(2) 9(1)

C(4) -4340(2) 5783(2) 8959(2) 18(1)

N(4) -4340(2) 5783(2) 8959(2) 18(1)

C(5) -5584(3) 6354(2) 4570(2) 16(1)

C(6) -6901(3) 6238(2) 3752(2) 15(1)

C(7) -8398(2) 6114(2) 4019(2) 12(1)

C(8) -8469(3) 6084(2) 5122(2) 13(1)

C(9) -7085(3) 6171(2) 5887(2) 12(1)

C(10) -9855(2) 6048(2) 3175(2) 12(1)

C(11) -9876(3) 5516(2) 2177(2) 18(1)

C(12) -11270(3) 5499(2) 1414(2) 18(1)

C(13) -11278(2) 6549(2) 3352(2) 13(1)

C(14) -12611(2) 6500(2) 2538(2) 12(1)

N(5) -5649(2) 6316(2) 5628(2) 13(1)

N(6) -12631(2) 5986(2) 1578(2) 13(1)

______________________________________________________________________________

Table 3. Bond lengths [Å] and angles [] for [Cu2(CN)2(4,4'-bpy)].

_____________________________________________________

Cu(1)-N(4)#1 1.936(2)

Cu(1)-C(4)#1 1.936(2)

Cu(1)-C(1) 1.9440(19)

Cu(1)-N(6)#2 2.0669(19)

Cu(1)-C(4)#3 2.363(2)

Cu(1)-N(4)#3 2.363(2)

Cu(1)-Cu(1)#4 2.4841(7)

Cu(2)-C(2) 1.886(2)

Cu(2)-C(3) 1.9084(19)

Cu(2)-N(5) 2.0670(18)

C(1)-C(2) 1.155(3)

C(3)-C(4) 1.149(3)

C(4)-Cu(1)#5 1.936(2)

C(4)-Cu(1)#6 2.363(2)

C(5)-N(5) 1.345(3)

C(5)-C(6) 1.383(3)

C(6)-C(7) 1.396(3)

C(7)-C(8) 1.402(3)

C(7)-C(10) 1.481(3)

C(8)-C(9) 1.382(3)

C(9)-N(5) 1.344(3)

C(10)-C(11) 1.393(3)

C(10)-C(13) 1.405(3)

C(11)-C(12) 1.385(3)

C(12)-N(6) 1.346(3)

C(13)-C(14) 1.384(3)

C(14)-N(6) 1.341(3)

N(6)-Cu(1)#7 2.0669(18)

N(4)#1-Cu(1)-C(4)#1 0.00(17)

N(4)#1-Cu(1)-C(1) 127.47(8)

C(4)#1-Cu(1)-C(1) 127.47(8)

N(4)#1-Cu(1)-N(6)#2 113.62(8)

C(4)#1-Cu(1)-N(6)#2 113.62(8)

C(1)-Cu(1)-N(6)#2 106.03(8)

N(4)#1-Cu(1)-C(4)#3 110.21(7)

C(4)#1-Cu(1)-C(4)#3 110.21(7)

C(1)-Cu(1)-C(4)#3 99.09(8)

N(6)#2-Cu(1)-C(4)#3 94.61(7)

N(4)#1-Cu(1)-N(4)#3 110.21(7)

C(4)#1-Cu(1)-N(4)#3 110.21(7)

C(1)-Cu(1)-N(4)#3 99.09(8)

N(6)#2-Cu(1)-N(4)#3 94.61(7)

C(4)#3-Cu(1)-N(4)#3 0.00(13)

N(4)#1-Cu(1)-Cu(1)#4 63.21(6)

C(4)#1-Cu(1)-Cu(1)#4 63.21(6)

C(1)-Cu(1)-Cu(1)#4 128.64(6)

N(6)#2-Cu(1)-Cu(1)#4 112.87(5)

C(4)#3-Cu(1)-Cu(1)#4 47.01(6)

N(4)#3-Cu(1)-Cu(1)#4 47.01(6)

C(2)-Cu(2)-C(3) 139.40(8)

C(2)-Cu(2)-N(5) 112.11(8)

C(3)-Cu(2)-N(5) 107.83(8)

C(2)-C(1)-Cu(1) 176.61(18)

C(1)-C(2)-Cu(2) 173.24(19)

C(4)-C(3)-Cu(2) 169.76(18)

C(3)-C(4)-Cu(1)#5 163.41(19)

C(3)-C(4)-Cu(1)#6 126.80(17)

Cu(1)#5-C(4)-Cu(1)#6 69.78(7)

N(5)-C(5)-C(6) 123.5(2)

C(5)-C(6)-C(7) 119.3(2)

C(6)-C(7)-C(8) 117.20(19)

C(6)-C(7)-C(10) 121.6(2)

C(8)-C(7)-C(10) 121.22(19)

C(9)-C(8)-C(7) 119.60(19)

N(5)-C(9)-C(8) 123.1(2)

C(11)-C(10)-C(13) 117.36(19)

C(11)-C(10)-C(7) 122.17(19)

C(13)-C(10)-C(7) 120.5(2)

C(12)-C(11)-C(10) 119.5(2)

N(6)-C(12)-C(11) 123.3(2)

C(14)-C(13)-C(10) 119.2(2)

N(6)-C(14)-C(13) 123.5(2)

C(9)-N(5)-C(5) 117.25(18)

C(9)-N(5)-Cu(2) 122.71(15)

C(5)-N(5)-Cu(2) 120.03(14)

C(14)-N(6)-C(12) 117.24(18)

C(14)-N(6)-Cu(1)#7 119.90(14)

C(12)-N(6)-Cu(1)#7 122.85(15)

_____________________________________________________________

Symmetry transformations used to generate equivalent atoms:

#1 x+1/2,-y+3/2,z-1/2 #2 x+3/2,-y+3/2,z+1/2

#3 -x-1/2,y+1/2,-z+3/2 #4 -x,-y+2,-z+1 #5 x-1/2,-y+3/2,z+1/2

#6 -x-1/2,y-1/2,-z+3/2 #7 x-3/2,-y+3/2,z-1/2

Table 4. Anisotropic displacement parameters (Å2x 103) for [Cu2(CN)2(4,4'-bpy)]. The anisotropic displacement factor exponent takes the form: -2p2[ h2 a*2U11 + ... + 2 h k a* b* U12 ]

______________________________________________________________________________

U11 U22 U33 U23 U13 U12

______________________________________________________________________________

Cu(1) 11(1) 14(1) 8(1) 1(1) 1(1) -2(1)

Cu(2) 10(1) 16(1) 9(1) 2(1) 2(1) -2(1)

C(1) 12(1) 12(1) 6(1) -1(1) 3(1) -2(1)

N(1) 12(1) 12(1) 6(1) -1(1) 3(1) -2(1)

C(2) 18(1) 21(1) 11(1) -2(1) 0(1) 0(1)

N(2) 18(1) 21(1) 11(1) -2(1) 0(1) 0(1)

C(3) 10(1) 12(1) 7(1) 1(1) 1(1) -2(1)

N(3) 10(1) 12(1) 7(1) 1(1) 1(1) -2(1)

C(4) 14(1) 18(1) 21(1) -1(1) -1(1) 2(1)

N(4) 14(1) 18(1) 21(1) -1(1) -1(1) 2(1)

C(5) 10(1) 24(1) 13(1) 5(1) 2(1) -1(1)

C(6) 15(1) 20(1) 9(1) 3(1) 3(1) 2(1)

C(7) 12(1) 10(1) 12(1) 0(1) -1(1) 1(1)

C(8) 13(1) 13(1) 12(1) 0(1) 3(1) -1(1)

C(9) 14(1) 13(1) 9(1) 0(1) 2(1) -2(1)

C(10) 11(1) 13(1) 12(1) 1(1) 0(1) 0(1)

C(11) 14(1) 23(1) 14(1) -3(1) 0(1) 6(1)

C(12) 17(1) 24(1) 12(1) -6(1) 0(1) 6(1)

C(13) 13(1) 16(1) 10(1) -2(1) 1(1) 0(1)

C(14) 11(1) 16(1) 11(1) -1(1) 3(1) 1(1)

N(5) 12(1) 17(1) 10(1) 2(1) 0(1) -2(1)

N(6) 12(1) 15(1) 10(1) -2(1) 0(1) 0(1)

______________________________________________________________________________

Table 5. Hydrogen coordinates ( x 104) and isotropic displacement parameters (Å2x 10 3)

for [Cu2(CN)2(4,4'-bpy)].

______________________________________________________________________________

x y z U(eq)

______________________________________________________________________________

H(5) -4601 6465 4379 19

H(6) -6792 6242 3032 17

H(8) -9440 6007 5337 15

H(9) -7150 6126 6614 14

H(11) -8960 5176 2025 21

H(12) -11266 5133 755 22

H(13) -11323 6909 4007 16

H(14) -13542 6842 2662 15

______________________________________________________________________________
