# Supplementary material for: Solid state coordination chemistry of the copper(I)–cyano–organodiimine system. Two- and three-dimensional copper cyanide phases incorporating linear dipodal ligands
Source: Royal Society of Chemistry journal article supplement (doi:10.1039/b100390i), 2001-01-01
Supplement: b100390i-13.doc [file b100390i-13.doc]

Table 1. Crystal data and structure refinement for [Cu2(CN)2(dpe)].

Identification code [Cu2(CN)2(dpe)]

Empirical formula C14H10Cu2N4

Formula weight 361.34

Temperature 115(2) K

Wavelength 0.71073 Å

Crystal system Triclinic

Space group P-1

Unit cell dimensions *a* = 6.861(3) Å = 97.908(11).

*b* = 9.329(5) Å = 99.529(11).

*c* = 11.793(6) Å  = 109.624(13).

Volume 685.8(6) Å3

Z 2

Density (calculated) 1.750 Mg/m3

Absorption coefficient 3.093 mm-1

F(000) 360

Crystal size 0.19 x 0.04 x 0.02 mm3

Theta range for data collection 1.79 to 28.33.

Index ranges -9<=h<=7, -12<=k<=10, -15<=l<=14

Reflections collected 4491

Independent reflections 3083 [R(int) = 0.0196]

Completeness to theta = 28.33 89.9 %

Absorption correction SADABS

Refinement method Full-matrix least-squares on F2

Data / restraints / parameters 3083 / 0 / 182

Goodness-of-fit on F2 1.027

Final R indices [I>2sigma(I)] R1 = 0.0375, wR2 = 0.1027

R indices (all data) R1 = 0.0419, wR2 = 0.1056

Extinction coefficient 0.010(2)

Largest diff. peak and hole 0.690 and -0.902 e.Å-3

Table 2. Atomic coordinates ( x 104) and equivalent isotropic displacement parameters (Å2x 103) for [Cu2(CN)2(dpe)]. U(eq) is defined as one third of the trace of the orthogonalized Uij tensor.

______________________________________________________________________________

x y z U(eq)

______________________________________________________________________________

Cu(1) 1554(1) 2741(1) 1010(1) 19(1)

Cu(2) 6126(1) 4200(1) 4945(1) 18(1)

N(5) 2208(4) 4532(3) 165(2) 18(1)

N(6) 5097(4) 12357(3) -4225(2) 19(1)

N(1) 320(4) 657(3) 215(2) 25(1)

N(2) 2848(4) 3538(3) 2645(2) 16(1)

N(3) 3921(4) 3954(3) 3582(2) 23(1)

N(4) 9105(4) 4798(3) 4988(2) 21(1)

C(1) 320(4) 657(3) 215(2) 25(1)

C(2) 2848(4) 3538(3) 2645(2) 16(1)

C(3) 3921(4) 3954(3) 3582(2) 23(1)

C(4) 9105(4) 4798(3) 4988(2) 21(1)

C(5) 3584(4) 5954(3) 743(2) 19(1)

C(6) 4221(4) 7202(3) 198(2) 19(1)

C(7) 1411(4) 4351(3) -996(2) 20(1)

C(8) 1931(4) 5545(3) -1602(2) 20(1)

C(9) 3388(4) 7027(3) -999(2) 18(1)

C(10) 4073(5) 8329(3) -1588(3) 20(1)

C(11) 2891(4) 8522(3) -2532(3) 19(1)

C(12) 3655(4) 9830(3) -3119(2) 18(1)

C(13) 5788(4) 10482(3) -3174(3) 21(1)

C(14) 6430(4) 11714(3) -3728(3) 21(1)

C(15) 2279(4) 10478(3) -3646(3) 23(1)

C(16) 3050(5) 11729(4) -4171(3) 23(1)

______________________________________________________________________________

Table 3. Bond lengths [Å] and angles [] for [Cu2(CN)2(dpe)].

_____________________________________________________

Cu(1)-N(1) 1.873(3)

Cu(1)-N(2) 1.912(3)

Cu(1)-N(5) 2.021(3)

Cu(2)-N(4) 1.919(3)

Cu(2)-N(3) 1.946(3)

Cu(2)-N(6)#1 2.071(3)

Cu(2)-C(3)#2 2.284(3)

Cu(2)-N(3)#2 2.284(3)

Cu(2)-Cu(2)#2 2.4883(11)

N(5)-C(5) 1.346(4)

N(5)-C(7) 1.353(4)

N(6)-C(16) 1.344(4)

N(6)-C(14) 1.352(4)

N(6)-Cu(2)#3 2.071(3)

N(1)-C(1)#4 1.159(6)

N(1)-N(1)#4 1.159(6)

N(2)-N(3) 1.155(4)

N(3)-Cu(2)#2 2.284(3)

N(4)-C(4)#5 1.152(5)

N(4)-N(4)#5 1.152(5)

C(5)-C(6) 1.385(4)

C(6)-C(9) 1.397(4)

C(7)-C(8) 1.383(4)

C(8)-C(9) 1.408(4)

C(9)-C(10) 1.461(4)

C(10)-C(11) 1.335(4)

C(11)-C(12) 1.471(4)

C(12)-C(15) 1.391(4)

C(12)-C(13) 1.400(4)

C(13)-C(14) 1.379(4)

C(15)-C(16) 1.384(4)

N(1)-Cu(1)-N(2) 127.78(12)

N(1)-Cu(1)-N(5) 122.75(12)

N(2)-Cu(1)-N(5) 108.55(10)

N(4)-Cu(2)-N(3) 125.68(12)

N(4)-Cu(2)-N(6)#1 111.06(10)

N(3)-Cu(2)-N(6)#1 109.30(11)

N(4)-Cu(2)-C(3)#2 102.19(11)

N(3)-Cu(2)-C(3)#2 108.43(10)

N(6)#1-Cu(2)-C(3)#2 95.60(10)

N(4)-Cu(2)-N(3)#2 102.19(11)

N(3)-Cu(2)-N(3)#2 108.43(10)

N(6)#1-Cu(2)-N(3)#2 95.60(10)

C(3)#2-Cu(2)-N(3)#2 0.00(15)

N(4)-Cu(2)-Cu(2)#2 130.53(9)

N(3)-Cu(2)-Cu(2)#2 60.55(9)

N(6)#1-Cu(2)-Cu(2)#2 110.36(7)

C(3)#2-Cu(2)-Cu(2)#2 47.88(7)

N(3)#2-Cu(2)-Cu(2)#2 47.88(7)

C(5)-N(5)-C(7) 117.3(2)

C(5)-N(5)-Cu(1) 120.03(19)

C(7)-N(5)-Cu(1) 122.60(19)

C(16)-N(6)-C(14) 116.8(2)

C(16)-N(6)-Cu(2)#3 121.16(19)

C(14)-N(6)-Cu(2)#3 122.02(19)

C(1)#4-N(1)-N(1)#4 0.0(4)

C(1)#4-N(1)-Cu(1) 174.4(4)

N(1)#4-N(1)-Cu(1) 174.4(4)

N(3)-N(2)-Cu(1) 168.0(2)

N(2)-N(3)-Cu(2) 161.6(2)

N(2)-N(3)-Cu(2)#2 126.8(2)

Cu(2)-N(3)-Cu(2)#2 71.57(10)

C(4)#5-N(4)-N(4)#5 0.0(4)

C(4)#5-N(4)-Cu(2) 177.9(4)

N(4)#5-N(4)-Cu(2) 177.9(4)

N(5)-C(5)-C(6) 123.0(3)

C(5)-C(6)-C(9) 120.0(3)

N(5)-C(7)-C(8) 123.4(3)

C(7)-C(8)-C(9) 119.3(3)

C(6)-C(9)-C(8) 117.0(3)

C(6)-C(9)-C(10) 120.5(3)

C(8)-C(9)-C(10) 122.4(3)

C(11)-C(10)-C(9) 124.7(3)

C(10)-C(11)-C(12) 123.1(3)

C(15)-C(12)-C(13) 116.8(3)

C(15)-C(12)-C(11) 121.2(3)

C(13)-C(12)-C(11) 121.9(3)

C(14)-C(13)-C(12) 119.8(3)

N(6)-C(14)-C(13) 123.3(3)

C(16)-C(15)-C(12) 120.0(3)

N(6)-C(16)-C(15) 123.3(3)

_____________________________________________________________

Symmetry transformations used to generate equivalent atoms:

#1 x,y-1,z+1 #2 -x+1,-y+1,-z+1 #3 x,y+1,z-1

#4 -x,-y,-z #5 -x+2,-y+1,-z+1

Table 4. Anisotropic displacement parameters (Å2x 103) for [Cu2(CN)2(dpe)]. The anisotropic displacement factor exponent takes the form: -2p2[ h2 a*2U11 + ... + 2 h k a* b* U12 ]

______________________________________________________________________________

U11 U22 U33 U23 U13 U12

______________________________________________________________________________

Cu(1) 19(1) 17(1) 18(1) 2(1) 3(1) 4(1)

Cu(2) 15(1) 20(1) 19(1) 5(1) 4(1) 6(1)

N(5) 19(1) 17(1) 18(1) 3(1) 5(1) 6(1)

N(6) 17(1) 19(1) 20(1) 5(1) 4(1) 6(1)

N(1) 22(1) 26(1) 23(1) 1(1) 2(1) 6(1)

N(2) 16(1) 16(1) 16(1) 2(1) 4(1) 5(1)

N(3) 19(1) 25(1) 25(1) 5(1) 7(1) 7(1)

N(4) 18(1) 26(1) 18(1) 3(1) 3(1) 10(1)

C(1) 22(1) 26(1) 23(1) 1(1) 2(1) 6(1)

C(2) 16(1) 16(1) 16(1) 2(1) 4(1) 5(1)

C(3) 19(1) 25(1) 25(1) 5(1) 7(1) 7(1)

C(4) 18(1) 26(1) 18(1) 3(1) 3(1) 10(1)

C(5) 20(1) 20(1) 15(1) 1(1) 3(1) 7(1)

C(6) 20(1) 17(1) 20(1) 2(1) 3(1) 6(1)

C(7) 20(1) 18(1) 19(1) -1(1) 1(1) 5(1)

C(8) 20(1) 22(1) 17(1) 4(1) 3(1) 8(1)

C(9) 17(1) 19(1) 20(1) 5(1) 5(1) 8(1)

C(10) 21(1) 18(1) 21(1) 3(1) 7(1) 7(1)

C(11) 16(1) 18(1) 23(1) 4(1) 7(1) 5(1)

C(12) 19(1) 18(1) 17(1) 3(1) 5(1) 6(1)

C(13) 17(1) 25(1) 23(1) 7(1) 5(1) 11(1)

C(14) 15(1) 25(1) 24(1) 5(1) 6(1) 7(1)

C(15) 13(1) 27(2) 27(2) 9(1) 3(1) 5(1)

C(16) 18(1) 26(1) 28(2) 10(1) 5(1) 10(1)

______________________________________________________________________________

Table 5. Hydrogen coordinates ( x 104) and isotropic displacement parameters (Å2x 10 3)

for [Cu2(CN)2(dpe)].

______________________________________________________________________________

x y z U(eq)

______________________________________________________________________________

H(5) 4131 6105 1545 22

H(6) 5203 8158 628 23

H(7) 465 3374 -1409 24

H(8) 1325 5370 -2398 24

H(10) 5428 9077 -1283 24

H(11) 1521 7796 -2833 23

H(13) 6769 10087 -2839 25

H(14) 7852 12124 -3761 25

H(15) 842 10071 -3646 27

H(16) 2105 12156 -4502 28

______________________________________________________________________________
